1 **Title:** Intronic enhancer region governs transcript-specific BDNF expression in neurons

2 **Authors and affiliations:** Jürgen Tuvikene<sup>1,3</sup>, Eli-Eelika Esvald<sup>\*,1,3</sup>, Annika Rähni<sup>\*,1</sup>, Kaie Uustalu<sup>\*,1</sup>, Anna  
3 Zhuravskaya<sup>2</sup>, Annela Avarlaid<sup>1</sup>, Eugene V. Makeyev<sup>2</sup>, Tõnis Timmusk<sup>1,3</sup>

4 \* equal contribution

5 <sup>1</sup> Department of Chemistry and Biotechnology, Tallinn University of Technology, Akadeemia tee 15, 12618,  
6 Tallinn, Estonia

7 <sup>2</sup> Centre for Developmental Neurobiology, King's College London, London SE1 1UL, United Kingdom

8 <sup>3</sup> Protobios LLC, Mäealuse 4, Tallinn 12618, Estonia

9 Corresponding authors: Tõnis Timmusk, Department of Chemistry and Biotechnology, Tallinn University  
10 of Technology, Akadeemia tee 15, 12618, Tallinn, Estonia. Phone: +372 6204444, e-mail:  
11 tonis.timmusk@taltech.ee; and

12 Jürgen Tuvikene, Department of Chemistry and Biotechnology, Tallinn University of Technology,  
13 Akadeemia tee 15, 12618, Tallinn, Estonia. Phone: +372 6204444, e-mail: jurgen.tuvikene@taltech.ee

14 **Number of pages:** 34

15 **Number of figures:** 8

16 **Number of supplementary figures:** 3

17 **Number of words for:**

18 **abstract:** 149

19 **introduction:** 568

20 **discussion:** 1263

## 21 **ABSTRACT**

22 Brain-derived neurotrophic factor (BDNF) controls the survival, growth, and function of neurons both  
23 during the development and in the adult nervous system. BDNF gene is transcribed from several distinct  
24 promoters generating transcripts with alternative 5' exons. BDNF transcripts initiated at the first cluster  
25 of exons have been associated with the regulation of body weight and various aspects of social behavior,  
26 but the mechanisms driving the expression of these transcripts have remained poorly understood. Here,  
27 we identify an evolutionarily conserved intronic enhancer region inside the BDNF gene that regulates both  
28 basal and stimulus-dependent expression of the BDNF transcripts starting from the first cluster of 5' exons  
29 in neurons. We further uncover a functional E-box element in the enhancer region, linking the expression  
30 of BDNF and various pro-neural basic helix-loop-helix transcription factors. Collectively, our results shed  
31 new light on the cell type- and stimulus-specific regulation of the important neurotrophic factor BDNF.

## 32 **INTRODUCTION**

33 Brain-derived neurotrophic factor (BDNF) is a secreted protein of the neurotrophin family (Park and Poo,  
34 2013). During the development, BDNF promotes the survival of various sensory neuron populations  
35 (Ernfors et al., 1994; Jones et al., 1994). In the adult organism, BDNF is also required for the proper

36 maturation of synaptic connections and regulation of synaptic plasticity (Korte et al., 1995; Park and Poo,  
37 2013). Defects in BDNF expression and signaling have been implicated in various neuropsychiatric and  
38 neurodegenerative diseases, including major depression, schizophrenia, Alzheimer's disease and  
39 Huntington's disease (Autry and Monteggia, 2012; Burbach et al., 2004; Jiang and Salton, 2013; Murray et  
40 al., 1994; Ray et al., 2014; Wong et al., 2010; Zuccato et al., 2001; Zuccato and Cattaneo, 2009).

41 Murine BDNF gene contains eight independently regulated non-coding 5' exons (exons I-VIII) followed by  
42 a single protein-coding 3' exon (exon IX). Splicing of one of the alternative exons I-VIII with the constitutive  
43 exon IX gives rise to different BDNF transcripts (Aid et al., 2007). Additionally, transcription can start from  
44 an intronic position upstream of the coding exon producing an unspliced 5' extended variant of the coding  
45 exon (exon IXa-containing transcript) (Aid et al., 2007). The usage of multiple promoters enables complex  
46 cell-type and stimulus-specific BDNF expression (reviewed in West et al., 2014). For instance, BDNF exon  
47 I, II, and III-containing transcripts show mainly nervous system-specific expression patterns, whereas  
48 BDNF exon IV and VI-containing transcripts are expressed in both neural and non-neural tissues (Aid et  
49 al., 2007; Timmusk et al., 1993). Similar expression patterns for different BDNF transcripts are also  
50 observed in human (Pruunsild et al., 2007). Notably, different BDNF transcripts have distinct contribution  
51 to various aspects of neural circuit functions and behavior (Hallock et al., 2019; Hill et al., 2016; Maynard  
52 et al., 2016a, 2018a; McAllan et al., 2018; Sakata et al., 2009).

53 In addition to proximal promoter regions, the complex regulation of gene expression is often controlled  
54 by distal regulatory elements called enhancers (reviewed in Buecker and Wysocka, 2012). Enhancers are  
55 usually active in a tissue- and cell type-specific manner (reviewed in Heinz et al., 2015; Wu et al., 2014),  
56 and can be located inside or outside, upstream or downstream of the target gene, within another gene or  
57 even on a different chromosome (Banerji et al., 1981; Lettice et al., 2003; reviewed in Ong and Corces,  
58 2011). Many enhancers are activated only after specific stimuli which cause enrichment of active  
59 enhancer-associated histone modifications and increased chromatin accessibility (Su et al., 2017).  
60 Genome-wide analysis has proposed approximately 12000 neuronal activity-regulated enhancers in  
61 cortical neurons (Kim et al., 2010). Importantly, dysregulation of enhancers or mutations in proteins that  
62 participate in the formation of enhancer-promoter complexes are associated with a variety of disorders,  
63 including neurodegenerative diseases (reviewed in Carullo and Day, 2019).

64 Previous studies from our laboratory have suggested that the expression of the BDNF gene is also  
65 regulated via distal regulatory regions. Notably, the induction of BDNF mRNA after BDNF-TrkB signaling in  
66 neurons seems to depend on unknown distal regulatory regions (Esveld et al., 2020). Furthermore,  
67 dopamine-induced expression of BDNF in astrocytes is controlled by an unknown regulatory region within  
68 the BDNF gene locus (Koppel et al., 2018). Here, we identify a novel enhancer region in the BDNF gene  
69 located downstream of the BDNF exon III and show that this regulatory element selectively activates basal  
70 and stimulus-dependent expression of the exon I, II and III-containing BDNF transcripts in neurons.

## 71 **RESULTS**

### 72 **1. BDNF +3 kb region shows enhancer-associated characteristics in mouse and human brain tissue**

73 To uncover novel enhancer regions regulating BDNF expression in the central nervous system, we started  
74 with bioinformatic analysis of the enhancer-associated characteristics. Active enhancers are characterized  
75 by nucleosome-free DNA that is accessible to transcription factors and other DNA binding proteins.

76 Chromatin at active enhancer regions typically has distinct histone modifications – H3K4me1, a hallmark  
77 of enhancer regions, and H3K27ac, usually associated with active regulatory regions. Active enhancers  
78 also bind RNA polymerase II and are bidirectionally transcribed from the regions marked by enhancer-  
79 associated histone modifications giving rise to non-coding enhancer RNAs (eRNAs) (Nord and West, 2020).  
80 Based on the mouse brain tissue ChIP-seq data from the ENCODE project and transcription start site (TSS)  
81 data from the FANTOM5 consortium, a region ~3 kb downstream of BDNF exon I TSS has prominent  
82 enhancer-associated features (Figure 1A). First, the +3 kb region is hypersensitive to DNaseI, indicative of  
83 an open chromatin structure. Second, ChIP-seq data shows that this region is enriched for H3K4me1,  
84 H3K4me3 and H3K27ac modifications. Third, the +3 kb region interacts with RNA polymerase II, with a  
85 strong evidence for bidirectional transcription according to the FANTOM5 CAGE database. Finally, the  
86 region is conserved between mammals, pointing at its possible functional importance.

87 We next used H3K27ac ChIP-seq data from Nord et al (Nord et al., 2013) to determine the activity of the  
88 potential enhancer region in different tissues throughout the mouse development. We found that the +3  
89 kb region shows H3K27ac mark in the mouse forebrain, with the highest signal from embryonic day 14 to  
90 postnatal day 7, but not in the heart or liver (Supplementary Figure 1). This suggests that the +3 kb  
91 enhancer region might be active mainly in neural tissues in late prenatal and early postnatal life.

92 To further investigate which cell-types the +3 kb region could be active in human *in vivo*, we used data  
93 from a recently published human brain cell-type-specific ATAC-seq and ChIP-seq experiments (Nott et al.,  
94 2019) (Figure 1B). We found that the +3 kb region shows remarkable neuron specificity, as evident from  
95 open chromatin identified using ATAC-seq, and H3K27ac histone mark, which are missing in microglia,  
96 oligodendrocytes, and astrocytes. To further elucidate which human tissues and cell types the +3 kb region  
97 could be active in, we used the Slidebase tool (Ienasescu et al., 2016) that gathers data of transcription  
98 start sites from FANTOM5 consortia and summarizes eRNA transcription levels based on various tissue  
99 and cell types. We found that in human the +3 kb region shows the strongest eRNA expression in the  
100 brain, spinal cord, and olfactory region (Figure 1C). When grouped by cell type, the strongest expression  
101 of +3 kb eRNAs is in hair follicle cells, neurons, and trabecular meshwork cells (Figure 1D).

102 Collectively, this data suggests that the +3 kb region is an evolutionarily conserved nervous system-specific  
103 enhancer that is active mostly in neural tissues and predominantly in neurons but not in other major brain  
104 cell types.

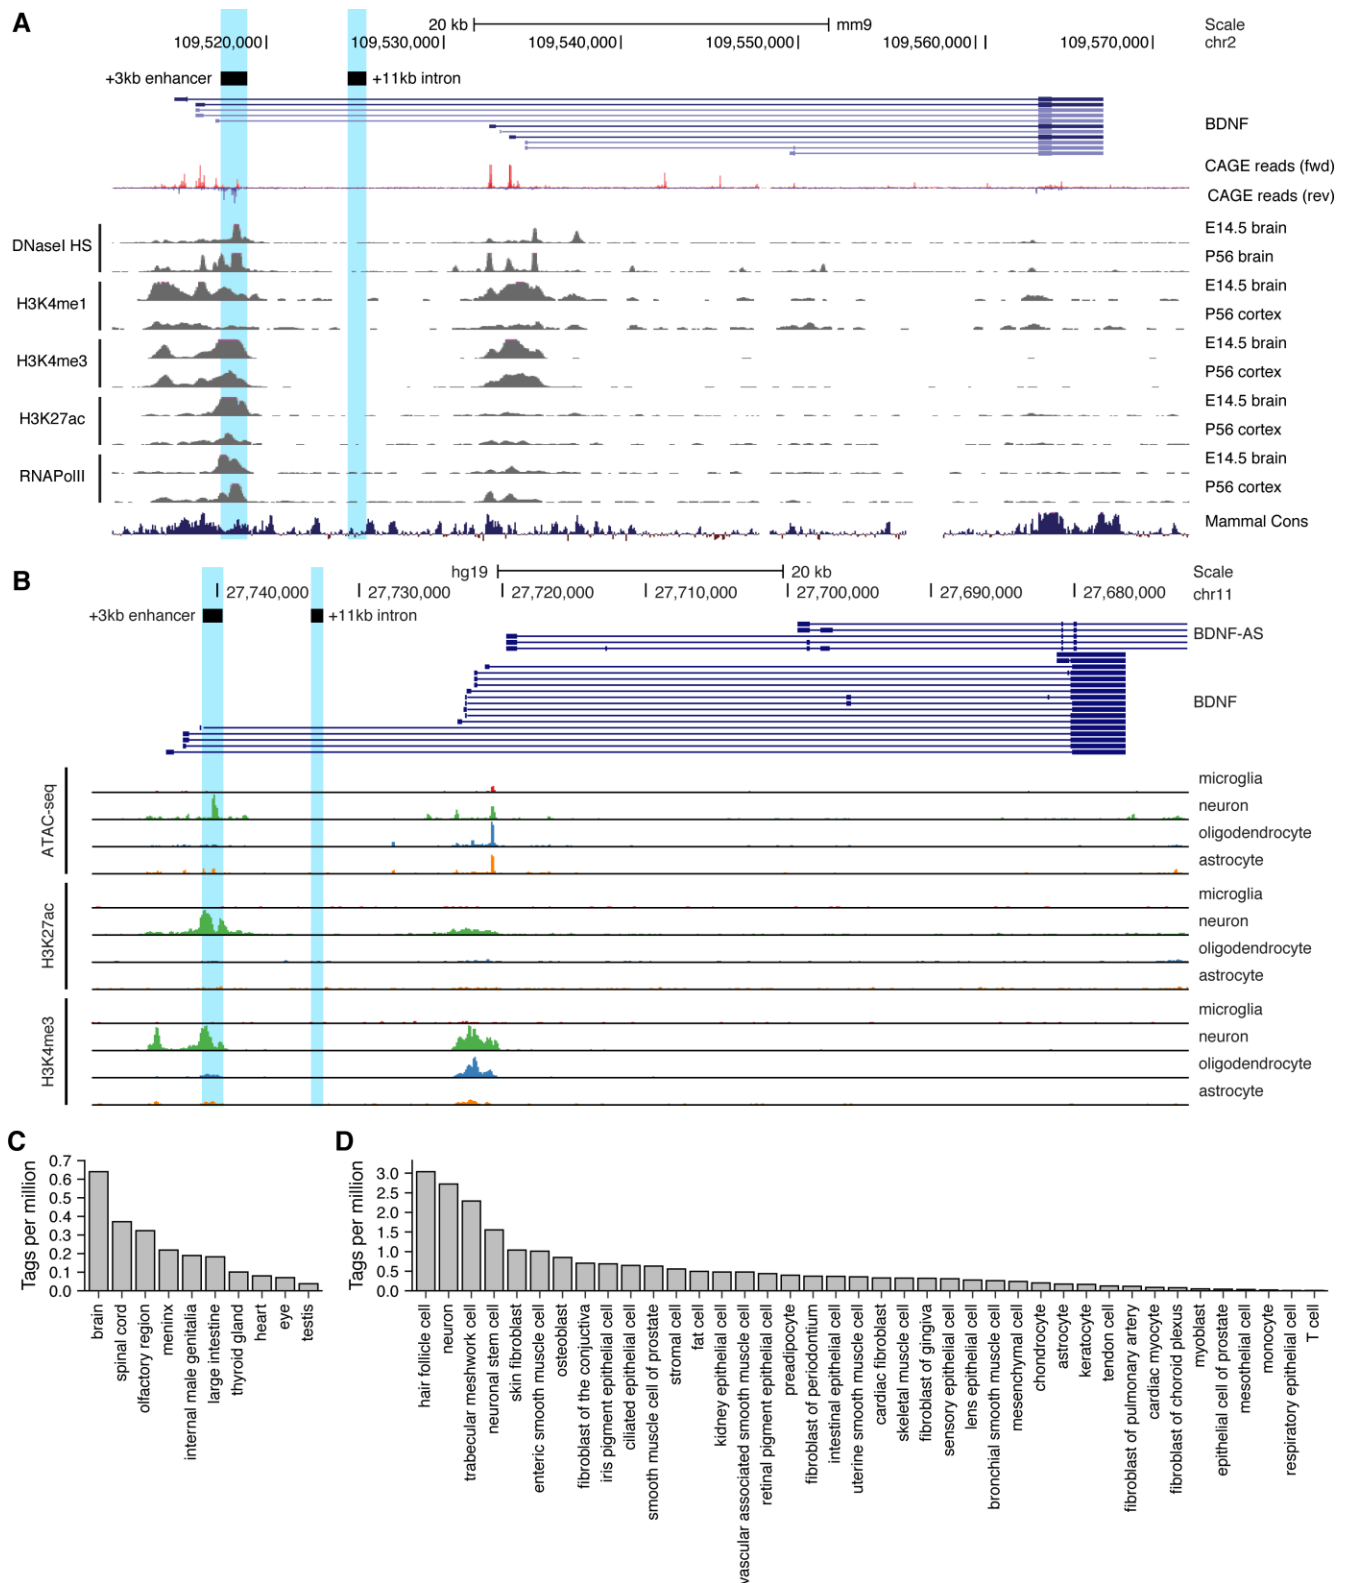

105

106 *Figure 1. Region downstream of BDNF exon III shows enhancer-associated characteristics in mouse and human neural tissues.*

107 *UCSC Genome browser was used to visualize (A) DNaseI hypersensitivity sites and ChIP-seq data from the ENCODE project in mouse*

108 *brain tissue, CAGE data of transcription start sites from the FANTOM5 consortium (all tissues and cell types), and (B) open*

109 *chromatin (ATAC-seq) and ChIP-seq in different human brain cell-types by (Nott et al., 2019). E indicates embryonic day, P*

110 *postnatal day. Signal clipping outside the visualization range is indicated with purple color. The +3 kb region, a potential enhancer*  
111 *of the BDNF gene, and +11 kb intronic region, a negative control region used in the present study were converted from rat genome*  
112 *to mouse or human genome using UCSC Lifter tool and are shown as light blue. The names of the regions represent the distance*  
113 *of the respective region from rat BDNF exon I transcription start site. (C, D) +3 kb enhancer region (chr11:27693843-27694020,*  
114 *hg19 genome build) eRNA expression levels based on CAGE sequencing data from the FANTOM5 project obtained from the*  
115 *Slidebase tool (Ienasescu et al., 2016, <http://slidebase.binf.ku.dk>). eRNA expression levels were grouped by different tissue types*  
116 *(C) or different cell types (D). Only tissue and cell types with non-zero eRNA expression are shown.*

117

## 118 **2. +3 kb enhancer region shows bidirectional transcription in luciferase reporter assay in rat cultured** 119 **cortical neurons and astrocytes**

120 Based on the enhancer-associated characteristics of the +3 kb enhancer region, we hypothesized that the  
121 region could function as an enhancer region for BDNF gene in neural cells. It has been reported that the  
122 bidirectional transcription of enhancer RNAs (eRNAs) from the enhancer region is correlated with the  
123 expression of nearby genes, indicating that the transcription from an enhancer region is a proxy to  
124 enhancer's activity (Kim et al., 2010). Therefore, we first investigated whether the +3 kb enhancer region  
125 shows bidirectional transcription in rat cultured cortical neurons and astrocytes, the two major cell types  
126 in the brain, in a heterologous context using reporter assays. We cloned a ~1.4 kb fragment of the +3 kb  
127 enhancer and a similarly sized control (+11 kb) intronic sequence lacking enhancer-associated  
128 characteristics in either forward or reverse orientation upstream of the firefly luciferase gene (Figure 2A)  
129 and performed luciferase reporter assays.

130 In rat cortical neurons the +3 kb enhancer region showed very strong transcriptional activity (~300-fold  
131 higher compared to the promoterless luciferase reporter vector) that was independent of the orientation  
132 of the +3 kb region (Figure 2B). As expected, the +11 kb negative control reporter showed very low  
133 luciferase activity in cortical neurons. To determine whether the enhancer region is responsive to different  
134 stimuli in neurons and could be involved in stimulus-dependent regulation of the BDNF gene, we used  
135 two treatments shown to induce BDNF gene expression – KCl treatment to chronically depolarize the cells  
136 and mimic neuronal activity (Ghosh et al., 1994; Pruunsild et al., 2011), and BDNF treatment to activate  
137 TrkB signaling and mimic BDNF autoregulation (Esvald et al., 2020; Tuvikene et al., 2016; Yasuda et al.,  
138 2007). Our results indicate that the activity of the +3 kb region is upregulated ~2-3-fold in response to  
139 both stimuli, suggesting that the region could be a stimulus-dependent enhancer in neurons.

140 In rat cultured cortical astrocytes, the +3 kb enhancer construct showed modest transcriptional activity  
141 (depending on the orientation ~6-23-fold higher compared to the promoterless vector control, Figure 2C).  
142 We have previously shown that in cultured cortical astrocytes, BDNF is induced in response to dopamine  
143 treatment, and the induction is regulated by an unknown enhancer region within BDNF gene locus (Koppel  
144 et al., 2018). However, dopamine treatment had no significant effect on the activity of the +3 kb construct  
145 in cultured cortical astrocytes, suggesting that this region is not a dopamine-activated enhancer in  
146 astrocytes.

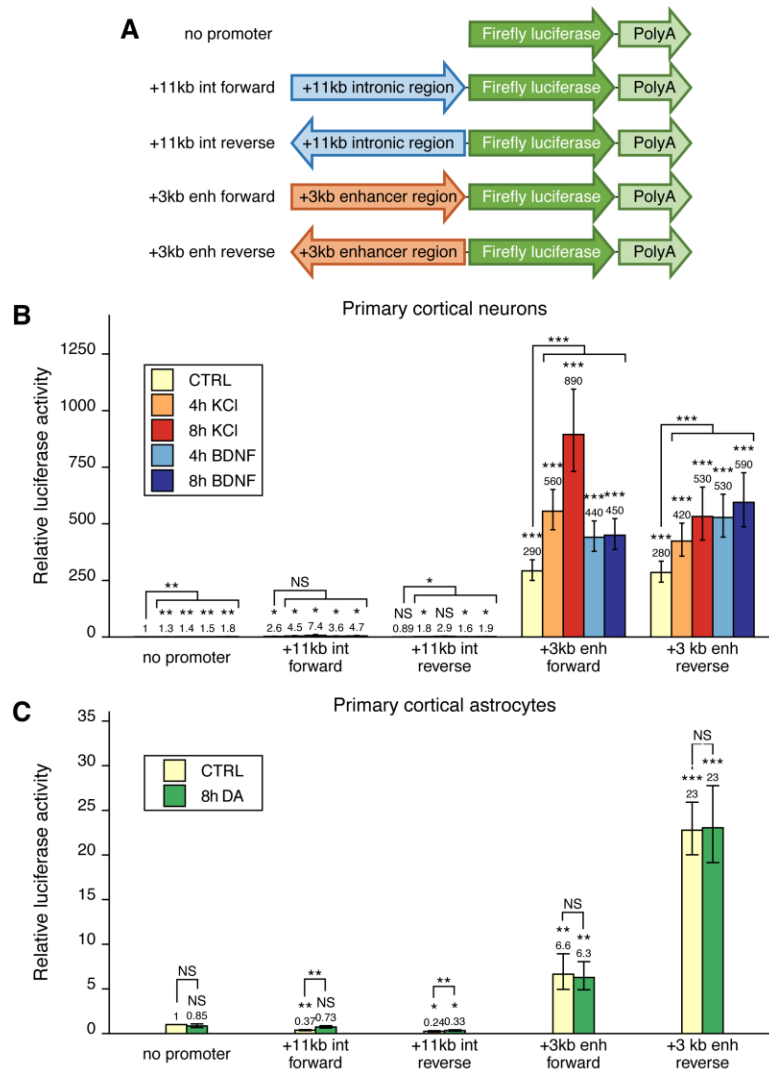

147

148 **Figure 2. +3 kb enhancer region shows bidirectional transcription in luciferase reporter assay in rat cultured cortical neurons**  
 149 **and astrocytes.** (A) Reporter constructs used in the luciferase reporter assay where the +3 kb enhancer region and the +11 kb  
 150 control region were cloned in either forward or reverse orientation (relative to the rat BDNF gene) in front of the luciferase  
 151 expression cassette. (B, C) Rat cortical neurons (B) or astrocytes (C) were transfected with the indicated reporter constructs at 6  
 152 and 13 DIV, respectively. 2 days post transfection, neurons were left untreated (CTRL) or treated with 25 mM KCl (with 5  $\mu$ M D-  
 153 APV) or 50 ng/ml BDNF for the indicated time (B); astrocytes were treated with 150  $\mu$ M dopamine (DA) or respective volume of  
 154 vehicle (CTRL) for the indicated time (C), after which luciferase activity was measured. Luciferase activity in cells transfected with  
 155 a vector containing no promoter and treated with vehicle or left untreated was set as 1. The average luciferase activity of  
 156 independent experiments is depicted above the columns. Error bars indicate SEM ( $n = 7$  (B, +3 kb enhancer constructs and no  
 157 promoter construct),  $n = 3$  (B, intron constructs), and  $n = 4$  (C) independent experiments). Asterisks above the columns indicate  
 158 statistical significance relative to luciferase activity in untreated cells transfected with the reporter vector containing no promoter,  
 159 or between indicated groups. NS – not significant, \*  $p < 0.05$ , \*\*  $p < 0.01$ , \*\*\*  $p < 0.001$  (paired two-tailed t-test).

160 **3. The +3 kb enhancer region potentiates the activity of BDNF promoters I and IV in luciferase reporter**  
 161 **assay in rat cultured cortical neurons**

162 To find out whether the newly identified +3 kb enhancer could control the activity of BDNF promoters in  
 163 a heterologous context, we cloned the +3 kb region or the +11 kb negative control sequence in forward  
 164 or reverse orientation (relative to the rat BDNF gene) downstream of BDNF promoter-driven luciferase  
 165 expression cassette (Figure 3A).



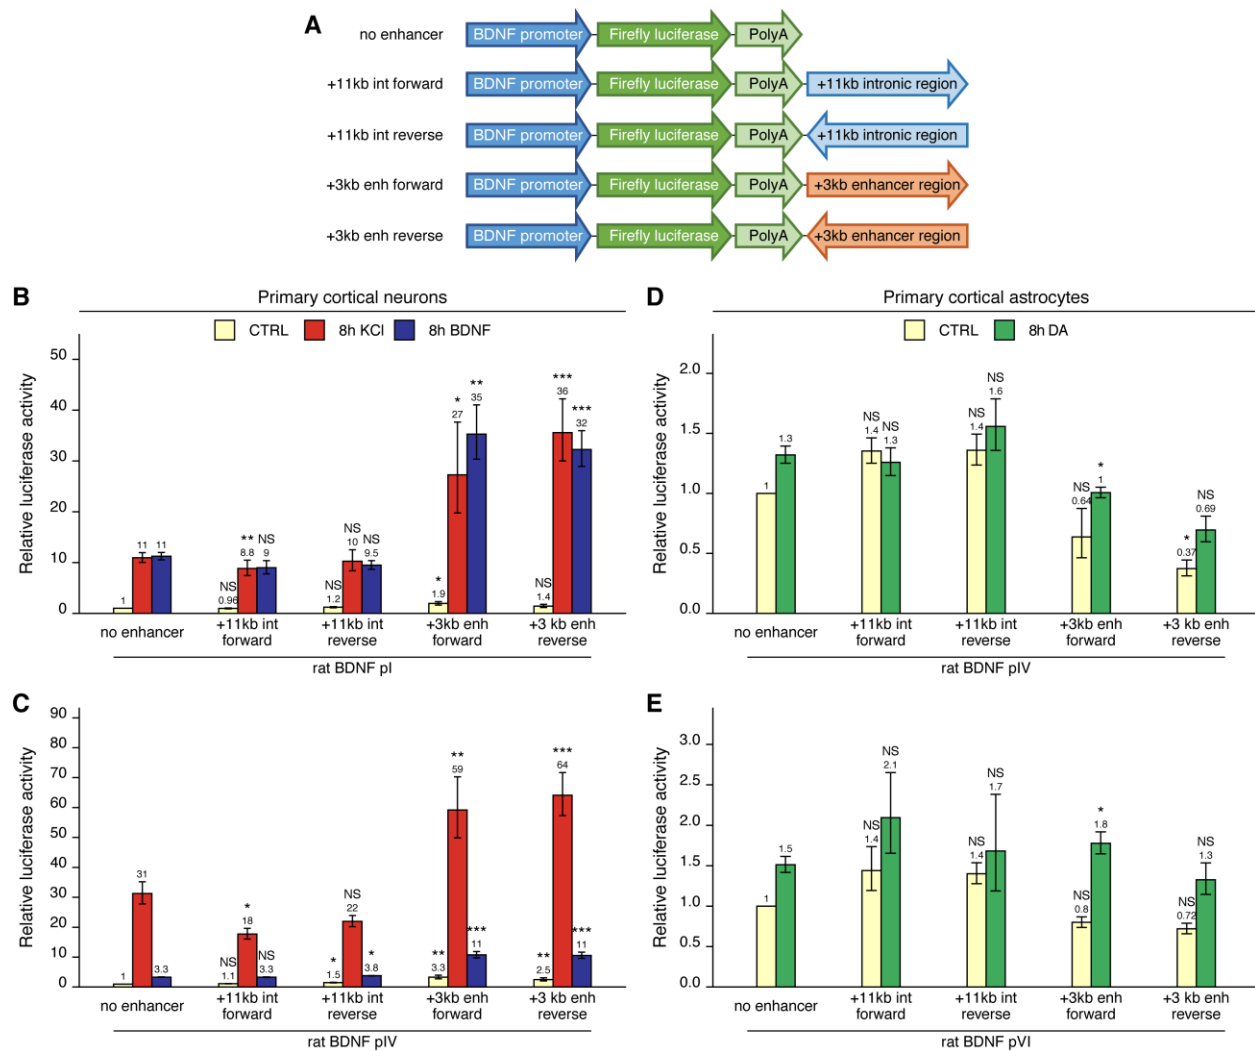

166

167 **Figure 3. +3 kb enhancer region potentiates the activity of BDNF promoters in luciferase reporter assay in rat cortical neurons**  
 168 **but not in astrocytes.** (A) A diagram of the used luciferase reporter constructs used in this experiment, with a BDNF promoter in  
 169 front of the firefly luciferase coding sequence and the +3 kb enhancer or +11 kb intronic region in either forward or reverse  
 170 orientation (relative to the rat BDNF gene) downstream of the luciferase expression cassette. Rat cortical neurons (B, C) or  
 171 astrocytes (D, E) were transfected with the indicated reporter constructs at 6 and 13 DIV, respectively. Two days post transfection,  
 172 neurons were left untreated (CTRL) or treated with 25 mM KCl (with 5  $\mu$ M D-APV) or 50 ng/ml BDNF for 8 hours (B, C); astrocytes  
 173 were treated with 150  $\mu$ M dopamine (DA) or respective volume of vehicle (CTRL) for 8 hours (D, E), followed by luciferase activity  
 174 assay. Luciferase activity is depicted relative to the luciferase activity in untreated or vehicle-treated (CTRL) cells transfected with  
 175 respective BDNF promoter construct without an enhancer region. The average luciferase activity of independent experiments is  
 176 shown above the columns. Error bars represent SEM ( $n = 6$  (B, +3 kb enhancer-containing constructs and no enhancer construct),  
 177  $n = 3$  (B, +11 kb intron constructs),  $n = 4$  (C) and  $n = 3$  (D-E) independent experiments). Statistical significance was calculated  
 178 compared to the activity of the respective BDNF promoter regions without the enhancer region after the respective treatment. NS  
 179 – not significant, \*  $p < 0.05$ , \*\*  $p < 0.01$ , \*\*\*  $p < 0.001$  (paired two-tailed t-test).

180 First, we transfected rat cultured cortical neurons with constructs containing BDNF promoter I and IV, as  
 181 these promoters are the most widely studied in neurons (West et al., 2014). We treated neurons with  
 182 either KCl or BDNF, and used luciferase reporter assay to measure the activity of the BDNF promoter  
 183 region. For BDNF promoter I (Figure 3B), the addition of the +3 kb enhancer region slightly increased the  
 184 basal activity of the promoter region (~1.5-2-fold). The +3 kb enhancer region also potentiated the KCl  
 185 and BDNF-induced activity of this promoter ~3-fold in an orientation-independent manner. Similar effects

186 were observed for BDNF promoter IV (Figure 3C), where the addition of the +3 kb enhancer region  
187 potentiated the basal activity of the promoter ~3-fold and KCl and BDNF-induced activity levels ~2-fold.  
188 The +11 kb intronic region failed to potentiate the activity of BDNF promoters I and IV.

189 Cortical astrocytes preferentially express BDNF transcripts containing exons IV and VI (Koppel et al., 2018).  
190 Therefore, we studied whether the +3 kb enhancer region could promote the activity of BDNF promoters  
191 IV and VI in rat cultured cortical astrocytes. The +3 kb enhancer did not significantly increase the activity  
192 of BDNF promoters IV and VI in unstimulated astrocytes and had virtually no effect on the response of  
193 these promoters to dopamine treatment (Figure 3D, 3E).

194 Overall, we found that in the heterologous context the +3 kb enhancer region could potentiate  
195 transcription from BDNF promoters in cultured cortical neurons, but not in cortical astrocytes. These  
196 results imply that the +3 kb enhancer could be important for BDNF gene expression in neurons, but not  
197 in astrocytes.

#### 198 **4. +3 kb enhancer region is a positive regulator of the first cluster of BDNF transcripts in rat cortical** 199 **neurons but is in an inactive state in rat cortical astrocytes.**

200 To investigate the functionality of the +3 kb region in its endogenous context, we used CRISPR interference  
201 (CRISPRi) and activator (CRISPRa) systems. Our system comprised of catalytically inactive Cas9 (dCas9)  
202 fused with Krüppel associated box domain (dCas9-KRAB, CRISPRi), or 8 copies of VP16 domain (VP64-  
203 dCas9-VP64, CRISPRa) to repress or activate the target region, respectively. dCas9 without effector  
204 domains was used to control for potential steric effects (Qi et al., 2013) on BDNF transcription when  
205 targeting CRISPR complex inside the BDNF gene. To direct the dCas9 and its variants to the desired  
206 location, we used four different gRNAs per region targeting either the +3 kb enhancer region or the +11  
207 kb intronic control region, with all gRNAs targeting the template strand to minimize the potential  
208 inhibitory effect of dCas9 binding on transcription elongation (as suggested by Qi et al., 2013). The +11 kb  
209 intronic control was used to rule out the possibility of CRISPRi and CRISPRa-induced passive spreading of  
210 chromatin modifications within the BDNF gene locus. As a negative control, we used a gRNA not  
211 corresponding to any sequence in the rat genome.

212 We first examined the functionality of the +3 kb enhancer region in cultured cortical neurons. Targeting  
213 the +3 kb enhancer or +11 kb intronic region with dCas9 without an effector domain had no major effect  
214 on the expression of any of the BDNF transcripts, indicating that targeting CRISPR complex to an intragenic  
215 region in BDNF gene does not itself affect BDNF gene expression (Figure 4, left panel). Repressing the +3  
216 kb enhancer region using CRISPRi decreased the basal expression levels of BDNF exon I, IIc, and III-  
217 containing transcripts by 2.2, 11, and 2.4-fold, respectively (Figure 4A, 4B, 4C, middle panel). In contrast,  
218 no significant effect was seen for basal levels of BDNF exon IV, VI, and IXa-containing transcripts (Figure  
219 4D, 4E, 4F, middle panel). Repressing the +3 kb enhancer region also decreased the KCl and BDNF-induced  
220 levels of transcripts starting from the first three 5' exons ~4-7-fold, but not of other BDNF transcripts  
221 (Figure 4A-F, middle panel). These effects correlated with subtle changes in total BDNF expression levels  
222 (Figure 4G, middle panel). Targeting CRISPRi to the +11 kb intronic region had no significant effect on any  
223 of the BDNF transcripts (Figure 4A-F, middle panel).

224



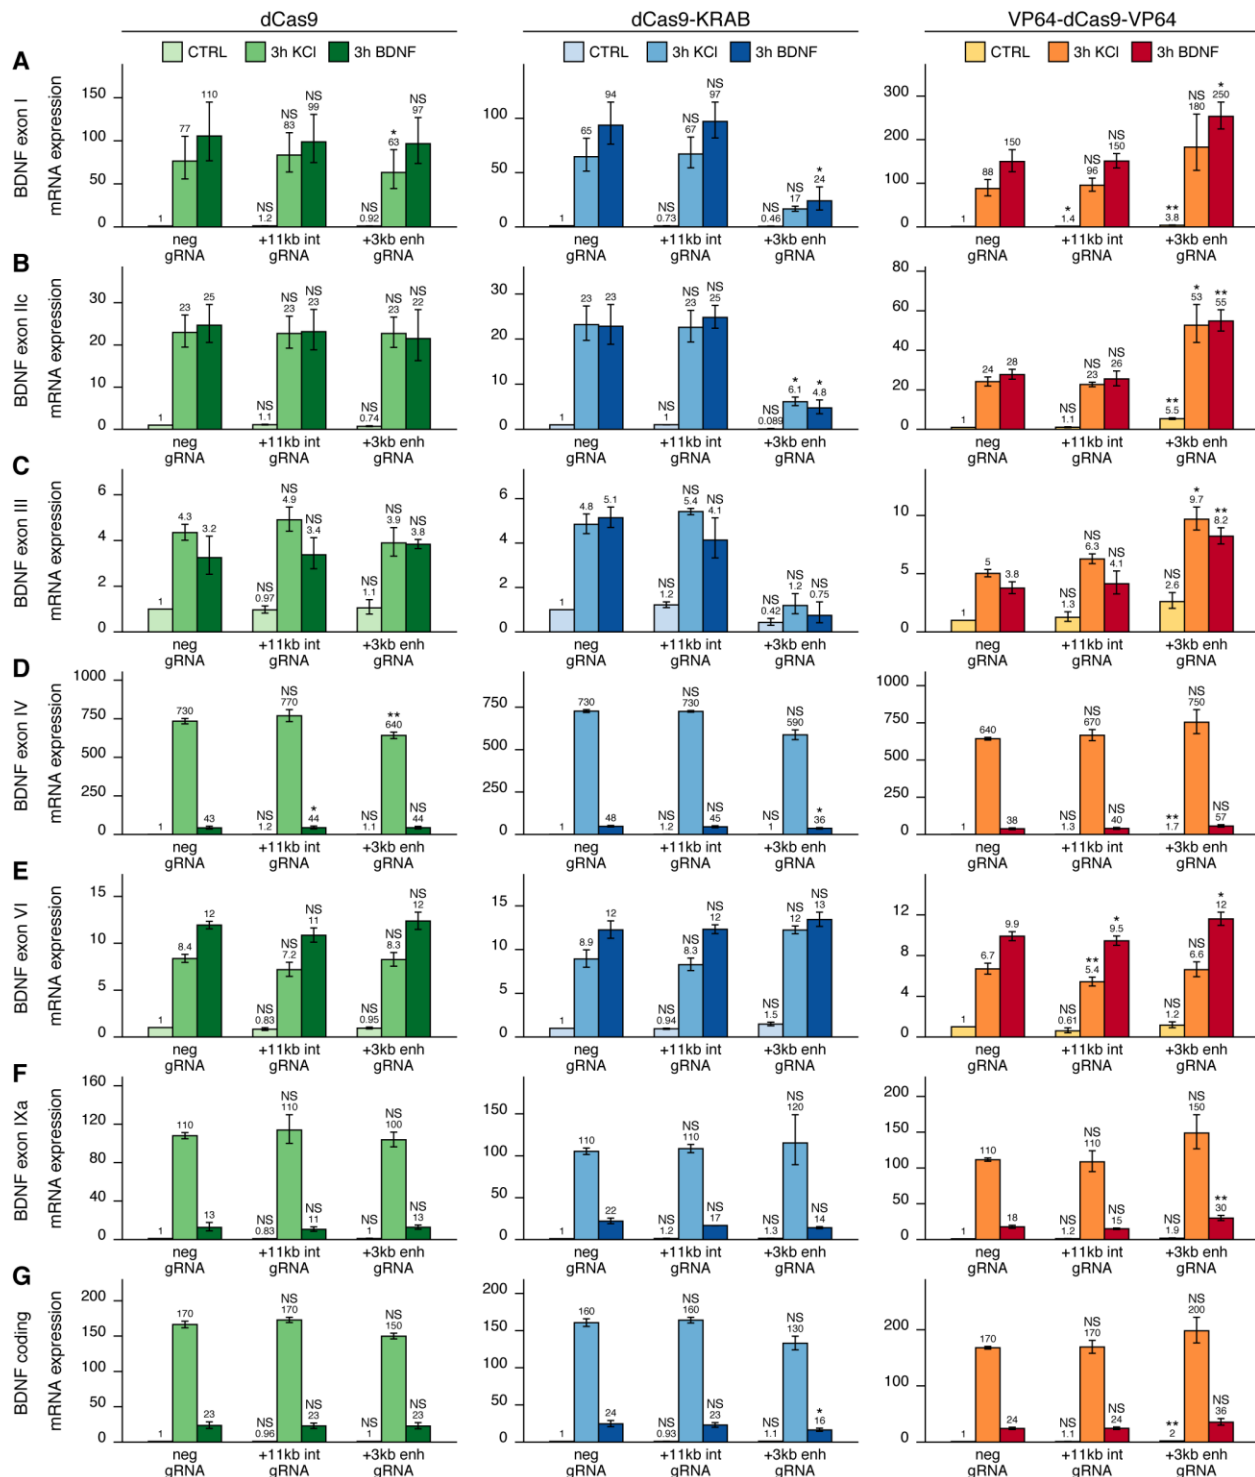

225

226 **Figure 4. +3 kb enhancer is a positive regulator of BDNF exon I, IIc, and III-containing transcripts in rat cortical neurons.** Rat  
 227 cultured cortical neurons were transduced at 0 DIV with lentiviral particles encoding either catalytically inactive Cas9 (dCas9, left  
 228 panel, green), dCas9 fused with Krüppel associated box domain (dCas9-KRAB, middle panel, blue) or 8 copies of VP16 domain  
 229 (VP64-dCas9-VP64, right panel, orange) together with lentiviruses encoding either guide RNA that has no corresponding target  
 230 sequence in the rat genome (neg gRNA), a mixture of four gRNAs directed to the putative +3 kb BDNF enhancer (+3 kb enh gRNA)  
 231 or a mixture of four guide RNAs directed to +11 kb intronic region (+11 kb int gRNA). Transduced neurons were left untreated  
 232 (CTRL) or treated with 50 ng/ml BDNF or 25 mM KCl (with 5  $\mu$ M D-APV) for 3 hours at 8 DIV. Expression levels of different BDNF

233 *transcripts were measured with RT-qPCR. mRNA expression levels are depicted relative to the expression of the respective*  
234 *transcript in untreated (CTRL) neurons transduced with negative guide RNA within each set (dCas9, dCas9-KRAB, or VP64-dCas9-*  
235 *VP64). The average mRNA expression of independent experiments is depicted above the columns. Error bars represent SEM (n = 3*  
236 *independent experiments). Statistical significance was calculated between the respective mRNA expression levels in respectively*  
237 *treated neurons transduced with neg gRNA within each set (dCas9, Cas9-KRAB, or VP64-dCas9-VP64). NS – not significant, \**  
238 *p<0.05, \*\* p<0.01, \*\*\* p<0.001 (paired two-tailed t-test).*

239 Activating the +3 kb enhancer region with CRISPRa in cultured cortical neurons increased the expression  
240 levels of BDNF transcripts of the first cluster (Figure 4A-C, right panel) both in unstimulated neurons (~3-  
241 5-fold) and after KCl or BDNF treatment (~2-fold). Slight effect of the activation was also seen for BDNF  
242 exon IV and IXa-containing transcripts (Figure 4D, 4F, right panel). Total BDNF basal levels also increased  
243 ~2-fold with CRISPR activation of the +3 kb enhancer region, whereas a slightly weaker effect was seen in  
244 stimulated neurons. As with CRISPRi, targeting CRISPRa to the +11 kb intronic region had no significant  
245 effect on the expression of any of the BDNF transcripts (Figure 4A-F, right panel).

246 Next, we carried out CRISPRi and CRISPRa experiments in cultured cortical astrocytes. Targeting dCas9 to  
247 the BDNF locus did not affect the expression of any of the BDNF transcripts (Figure 5A-F, left panel).  
248 Similarly, targeting CRISPRi to the +3 kb enhancer region in astrocytes did not affect the basal expression  
249 levels of any BDNF transcript (Figure 5, middle panel). In cells treated with dopamine, repressing +3 kb  
250 enhancer region completely abolished the induction of exon IIc-containing transcripts (Figure 5B, middle  
251 panel), but did not affect the expression of any of the other transcripts. In contrast, activating the +3 kb  
252 region with CRISPRa greatly increased both basal and dopamine-induced levels of all measured BDNF  
253 transcripts (Figure 5A-F, right panel). Targeting CRISPRi or CRISPRa to the +11 kb intronic control region  
254 did not have a noteworthy effect on any of the measured BDNF transcripts.

255 As bioinformatic analysis showed bidirectional transcription from the +3 kb enhancer (Figure 1) and our  
256 luciferase reporter assays also indicated this (Figure 2), we next decided to directly measure eRNAs from  
257 the +3 kb enhancer region in our cortical neurons and astrocytes. Since the sense eRNA is transcribed in  
258 the same direction as BDNF pre-mRNA, we could only reliably measure eRNAs from the antisense  
259 orientation from the +3 kb enhancer region using antisense eRNA-specific cDNA priming followed by qPCR  
260 (Supplementary figure 2A). We found that the +3 kb enhancer antisense eRNA was expressed in cultured  
261 neurons and the expression level of the eRNA was induced ~3.5- and ~6-fold upon BDNF and KCl  
262 treatment, respectively. Furthermore, repressing the +3 kb enhancer region using CRISPRi decreased the  
263 expression of the eRNA ~3-fold. However, activating the +3 kb enhancer region using CRISPRa did not  
264 change the expression level of the eRNA. When comparing +3 kb enhancer eRNA expression levels in  
265 neurons and astrocytes, the astrocytes showed ~6-fold lower eRNA transcription from the +3 kb enhancer  
266 region than neurons (Supplementary figure 2B), also indicating that the +3 kb region is in a more active  
267 state in our cultured neurons than in astrocytes.

268 The main findings of the CRISPRi and CRISPRa experiments are summarized in Figure 6. Taken together,  
269 our results suggest that the +3 kb enhancer region is an active BDNF enhancer in rat cultured cortical  
270 neurons and regulates the basal and stimulus-induced expression of BDNF transcripts of the first cluster  
271 of exons (exons I, II and III). In contrast, the +3 kb region is mostly inactive in rat cultured cortical  
272 astrocytes.

273

274

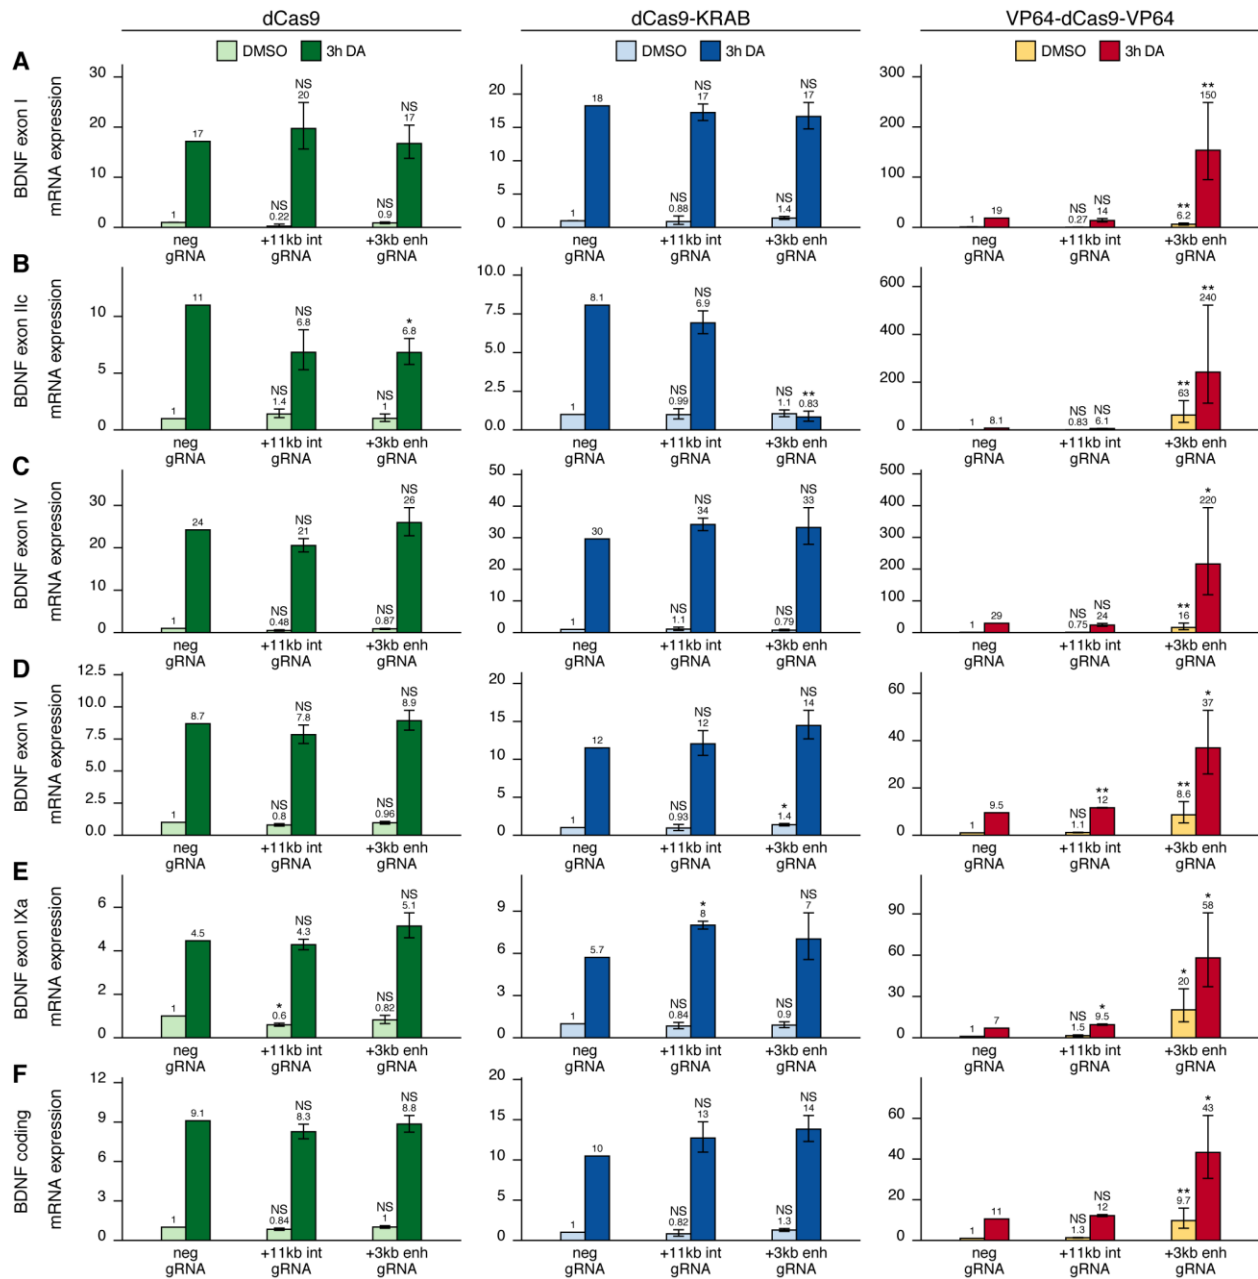

275

276 **Figure 5. +3 kb enhancer region is mainly inactive in rat cortical astrocytes.** Rat cultured cortical astrocytes were transduced at  
 277 7 DIV with lentiviral particles encoding either catalytically inactive Cas9 (dCas9, left panel, green), dCas9 fused with Krüppel  
 278 associated box domain (dCas9-KRAB, middle panel, blue) or 8 copies of VP16 domain (VP64-dCas9-VP64, right panel, orange)  
 279 together with lentiviruses encoding either guide RNA that has no corresponding target sequence in the rat genome (neg gRNA), a  
 280 mixture of four gRNAs directed to the putative +3 kb BDNF enhancer (+3 kb enh gRNA) or a mixture of four guide RNAs directed  
 281 to +11 kb intronic region (+11 kb int gRNA). Transduced astrocytes were treated with vehicle (CTRL) or with 150  $\mu$ M dopamine  
 282 (DA) for 3 hours at 15 DIV. Expression levels of different BDNF transcripts were measured with RT-qPCR. The levels of BDNF exon  
 283 III-containing transcripts were too low to measure reliably. mRNA expression levels are depicted relative to the expression of the  
 284 respective transcript in astrocytes treated with vehicle (CTRL) transduced with negative guide RNA within each set (dCas9, dCas9-  
 285 KRAB, or VP64-dCas9-VP64). The average mRNA expression of independent experiments is depicted above the columns. Error bars  
 286 represent SEM ( $n = 3$  independent experiments). Statistical significance was calculated between respective mRNA expression levels  
 287 in respectively treated astrocytes transduced with neg gRNA within each set (dCas9, Cas9-KRAB, or VP64-dCas9-VP64). NS – not  
 288 significant, \*  $p < 0.05$ , \*\*  $p < 0.01$ , \*\*\*  $p < 0.001$  (paired two-tailed t-test).

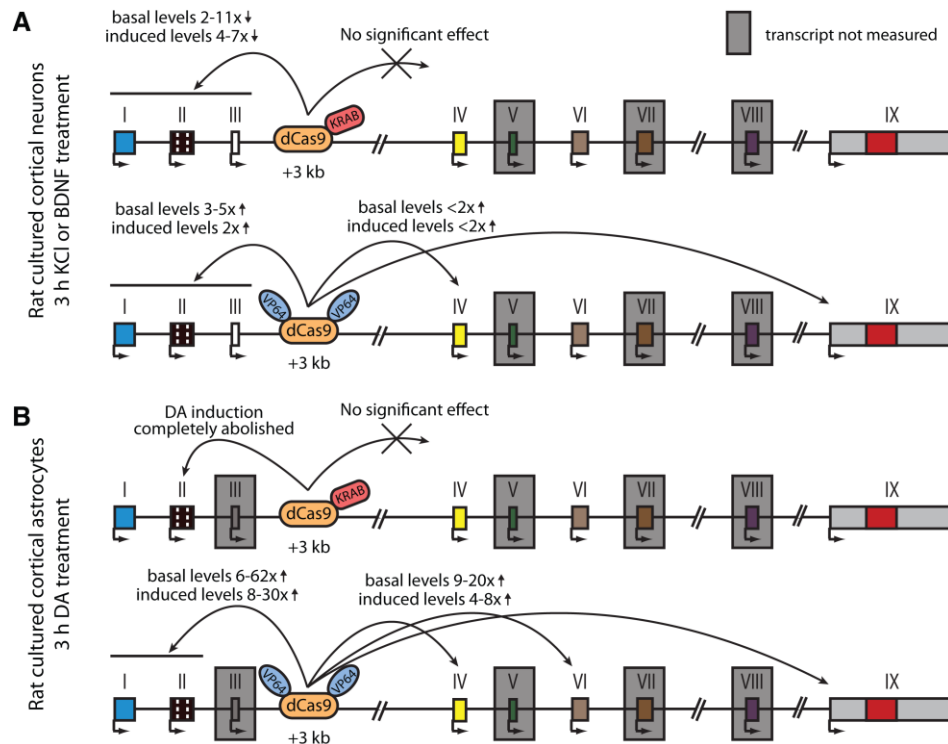

289

290 *Figure 6. Summary of the CRISPRi and CRISPRa experiments with BDNF +3 kb enhancer region in rat cultured cortical neurons*  
 291 *and astrocytes. Graphical representation of the main results shown in Figure 4 (A) and Figure 5 (B). Different BDNF exons are*  
 292 *shown with boxes, red box in exon IX indicates BDNF coding region. BDNF transcripts that were not measured or that had too low*  
 293 *levels to measure reliably are indicated with a grey box around the respective 5' exon.*

294

## 295 **5. Deletion of the +3 kb enhancer region in mouse embryonic stem cell-derived neurons decreases the** 296 **expression of BDNF transcripts starting from the first cluster of exons**

297 To test the regulatory function of the +3 kb enhancer directly and address biological significance of its  
 298 interspecies conservation, we used CRISPR/Cas9 system to delete the conserved core sequence of the  
 299 enhancer region in mouse embryonic stem cells engineered to express the pro-neural transcription factor  
 300 Neurogenin2 from a doxycycline-inducible promoter. We selected single-cell clones containing the  
 301 desired deletion, differentiated them into excitatory neurons (Ho et al., 2016; Thoma et al., 2012; Zhang  
 302 et al., 2013) by the addition of doxycyclin, treated the stem cell-derived neurons with BDNF or KCl, and  
 303 measured the expression of different BDNF transcripts using RT-qPCR.

304 The deletion of the +3 kb enhancer region strongly decreased both the basal and stimulus-dependent  
 305 expression levels of BDNF exon I, IIc, and III-containing transcripts (Figure 7A-C). Notably, the effect was  
 306 more prominent in clones containing homozygous deletion compared to heterozygous clones. We also  
 307 noted a slight, albeit not statistically significant decrease in the expression of BDNF exon IV and VI-  
 308 containing transcripts in cells where the +3 kb enhancer region was deleted (Figure 7D-E). This could be  
 309 attributed to impaired BDNF autoregulatory loop caused by the deficiency of transcripts from the first  
 310 cluster of exons. It is also possible that the +3 kb enhancer participates in the regulation of the transcripts  
 311 from the second cluster of exons, but the effect is only very subtle, which would explain why it was not  
 312 detected in our CRISPRi and CRISPRa experiments in cultured neurons. The levels of BDNF exon IXa were

313 too low to measure reliably (data not shown). The deletion of the +3 kb enhancer region respectively  
 314 decreased the total levels of BDNF similarly to the first cluster of BDNF transcripts (Figure 7F). These  
 315 results confirm the essential role of the +3 kb enhancer region in regulating the expression of BDNF exon  
 316 I, IIc, and III-containing transcripts in rodent neurons.

317

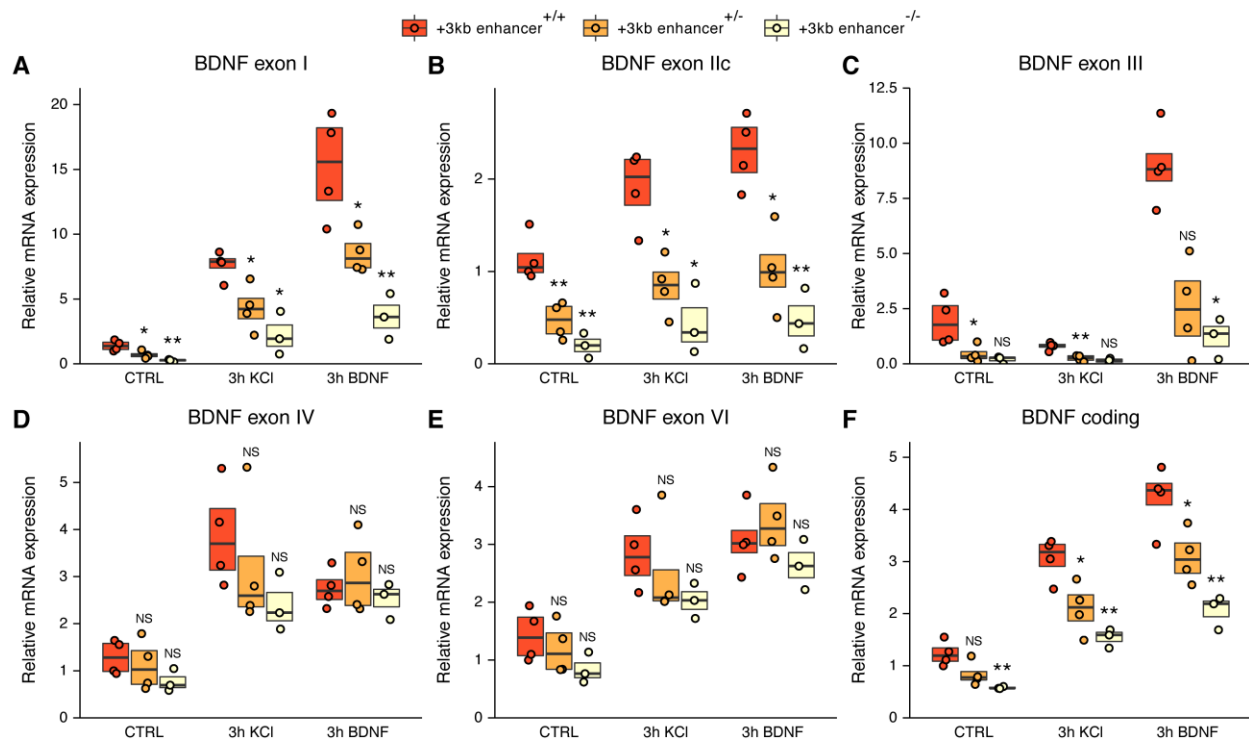

318

319 **Figure 7. The deletion of the +3 kb enhancer region decreases the expression of BDNF exon I, IIc, and III-containing transcripts**  
 320 **in mouse embryonic stem cell (mESC)-derived neurons.** CRISPR/Cas9 system was used to generate mESC cell lines with ~300-500  
 321 bp deletions of the conserved core region of the +3 kb BDNF enhancer. The obtained clonal cell lines containing intact +3 kb  
 322 enhancer region (+/+), heterozygous deletion (+/-), or homozygous deletion (-/-) of the +3 kb enhancer region were differentiated  
 323 into neurons using overexpression of Neurogenin2. After 12 days of differentiation, the cells were treated with vehicle (CTRL), 50  
 324 ng/ml BDNF or 25 mM KCl together with 25  $\mu$ M D-APV for 3 hours. The expression levels of different BDNF transcripts were  
 325 measured using RT-qPCR. The levels of respective BDNF transcripts measured in the parental cell line (also included as a data point  
 326 in the +/+ group) was set as 1. All data points (obtained from independent cell clones and parental cell line) are depicted with  
 327 circles. Box plot shows 25% and 75% quartiles and the horizontal line shows the median value. N = 3-4 independent cell clones for  
 328 each group. Statistical significance was calculated compared to the expression level of the respective transcript in the +/+ genotype  
 329 group at respective treatment. NS – not significant, \* p < 0.05, \*\* p < 0.01, \*\*\* p < 0.001 (equal variance unpaired t-test).

330

## 331 6. The activity of +3 kb enhancer region is regulated by CREB, AP-1 family and E-box-binding 332 transcription factors

333 To investigate the molecular mechanisms that control the activity of the +3 kb enhancer region, we used  
 334 *in vitro* DNA pulldown assay with 8 days old rat cortical nuclear lysates coupled with mass-spectrometric  
 335 analysis to determine the transcription factors that bind to the +3 kb enhancer region (Figure 8A).  
 336 Collectively, we determined 21 transcription factors that showed specific *in vitro* binding to the +3 kb  
 337 enhancer region compared to the +11 kb intronic region in two independent experiments (Figure 8B). Of

338 note, we found numerous E-box-binding proteins, including USFs, TCF4 and the pro-neural transcription  
339 factors NeuroD2 and NeuroD6, possibly providing the neuron specific activity of the +3 kb enhancer  
340 region. We also detected binding of JunD, a member of the AP-1 transcription factor family.

341 Next, we used various ChIP-seq experiments in different human cell lines from the ENCODE project and  
342 determined numerous transcription factors that bind to the +3 kb enhancer region, including CREB,  
343 CEBPB, EGR1 and JunD (Supplementary figure 3). We further used publicly available ChIP-seq data (see  
344 Materials and methods section for references) to visualize the binding of different transcription factors to  
345 the +3 kb enhancer region in mouse neural cells and tissues (Figure 8C). This data shows neuronal activity-  
346 dependent binding of NPAS4, c-Fos, and coactivator CBP to the enhancer region. In agreement with our  
347 *in vitro* pulldown results, ChIP-seq analysis also revealed binding of EGR1, NeuroD2 and TCF4 to the +3 kb  
348 enhancer region in the endogenous chromatin context.

349 Considering the CREB binding in ENCODE data (Supplementary figure 2) and CBP binding in cultured cortical  
350 neurons (Figure 8C), we first decided to investigate whether CREB binds BDNF +3 kb enhancer region in  
351 our rat cortical neurons. We performed ChIP-qPCR and determined that in cultured cortical neurons CREB  
352 binds to the +3 kb enhancer region, whereas we found no significant CREB binding to the +21 kb negative  
353 control region, located directly downstream of BDNF exon VII (Figure 8D). Of note, the binding of CREB to  
354 the +3 kb enhancer region was ~2.6-times stronger than binding to BDNF promoter IV, which contains the  
355 well-described CRE element (Hong et al., 2008; Tao et al., 1998). Next, we focused on the various E-box-  
356 binding proteins, as many E-box-binding proteins are proneural and could therefore confer the neural  
357 specificity of the +3 kb enhancer region. As transcription factors from the NeuroD family need  
358 dimerization partner from the class I helix-loop-helix proteins, e.g. TCF4, to bind DNA (Massari and Murre,  
359 2000; Ravanpay and Olson, 2008), we verified binding of TCF4 to the +3 kb region in our cultured neurons  
360 using TCF4 ChIP-qPCR (Figure 8D).

361 To determine functionally important transcription factors that regulate BDNF +3 kb enhancer region, we  
362 first screened a panel of dominant-negative transcription factors in luciferase reporter assay where the  
363 expression of luciferase was under control of the +3 kb enhancer region (Figure 8E). In agreement with  
364 the *in vitro* pulldown assay, ChIP-seq and ChIP-qPCR results, we found the strongest inhibitory effect using  
365 dominant negative versions of CREB (named A-CREB), ATF2 (named A-ATF2) and AP-1 family (named A-  
366 FOS). However, the effect of different dominant negative proteins was slightly lower when +3 kb enhancer  
367 region was in the reverse orientation. Our data suggests the role of CREB, AP-1 family proteins and ATF2  
368 in regulating the neuronal activity-dependent activation of the +3 kb enhancer region, whereas we found  
369 no notable evidence of USF family transcription factors and CEBPB regulating the activity of +3 kb  
370 enhancer region.



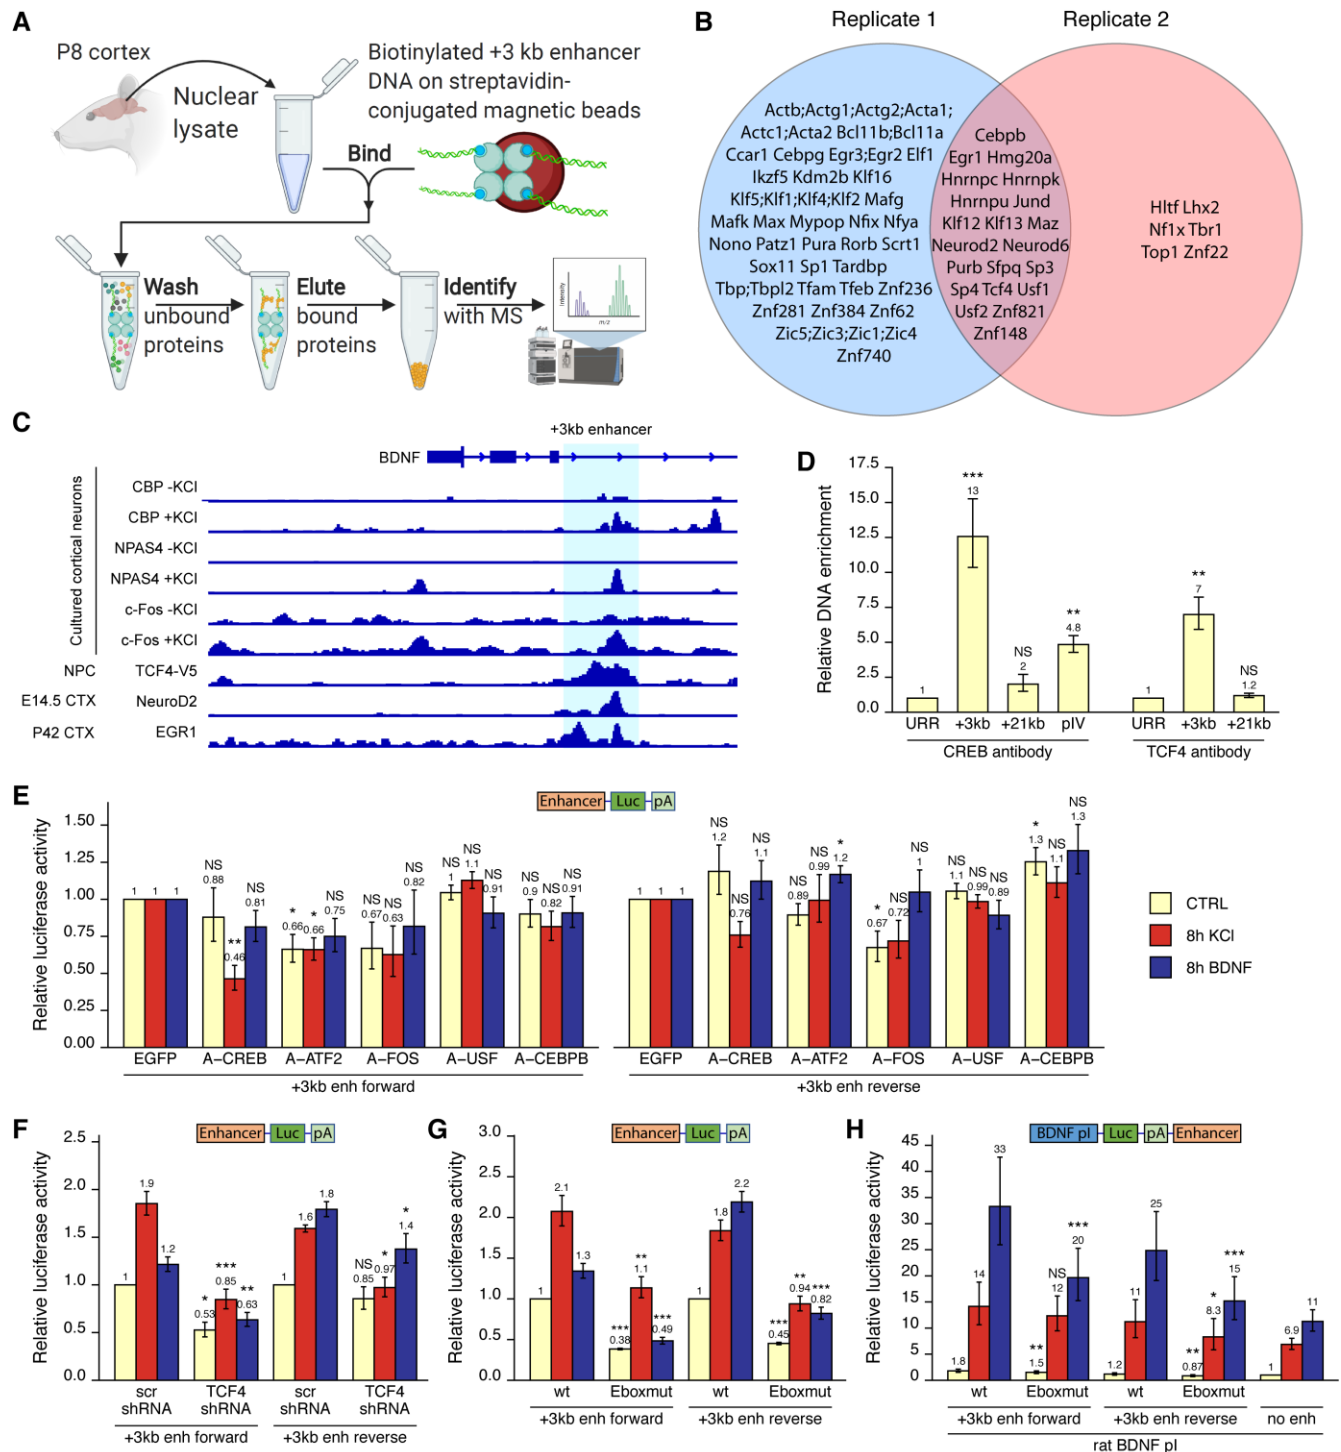

371

372 **Figure 8. Various transcription factors, including CREB, AP-1 proteins and E-box-binding transcription factors regulate the**  
 373 **activity of +3 kb enhancer region.** (A) Schematic overview of the *in vitro* DNA pulldown assay to determine transcription factors  
 374 binding to the +3 kb enhancer region. The illustration was created with BioRender.com. (B) Transcription factors identified in the  
 375 *in vitro* DNA pulldown assay in two biological replicates. Semicolon between protein names indicates uncertainty in the peptide  
 376 to protein assignment between the proteins separated by the semicolons. (C) Previously published ChIP-seq experiments showing  
 377 binding of different transcription factors to the +3 kb enhancer region. (D) ChIP-qPCR assay in cultured cortical neurons at 8 DIV  
 378 with anti-CREB or anti-TCF4 antibody. Enrichment is shown relative to the enrichment of unrelated region (URR) with the  
 379 respective antibody. +21 kb region (downstream of the BDNF exon VII) was used as a negative control. pIV indicates BDNF

380 promoter IV region. (E-H) Rat cortical neurons were transfected at 5 DIV (F) or 6 DIV (E-H) with reporter constructs where the +3  
381 kb enhancer region was cloned in front of the luciferase coding sequence (E-G, see also Figure 2A) or with reporter constructs  
382 where the +3 kb enhancer region was cloned downstream of the BDNF promoter I-controlled firefly luciferase expression cassette  
383 (H, see Figure 3A). Schematic representations of the used reporter constructs are shown above the graphs, with Luc designating  
384 luciferase coding sequence and pA polyadenylation sequence. At 8 DIV, neurons were left untreated (CTRL) or treated with 25 mM  
385 KCl (with 5  $\mu$ M D-APV) or 50 ng/ml BDNF for the indicated time, after which luciferase activity was measured. Luciferase activity  
386 is depicted relative to the luciferase activity in respectively treated cells transfected with EGFP and the respective +3 kb enhancer  
387 construct (E), relative to luciferase activity in untreated cells co-transfected with control shRNA (scr) and the respective +3 kb  
388 enhancer construct (F), relative to luciferase activity in untreated cells transfected with the respective wild-type (wt) +3 kb  
389 enhancer construct (G), or relative to luciferase activity in untreated cells transfected with rat BDNF promoter I construct  
390 containing no enhancer region (H). Eboxmut indicates mutation of a putative E-box element in the +3 kb enhancer region. Numbers  
391 above the columns indicate average, error bars represent SEM (n = 4 (D, TCF4 antibody), n = 3 (D, CREB antibody), n = 5-6 (E), n =  
392 4-5 (F), n=4 (G), n = 7 (H) independent experiments). Statistical significance was calculated compared to the ChIP enrichment of  
393 DNA at the URR region using respective antibody (D), compared to the luciferase activity in respectively treated cells transfected  
394 with respective +3 kb enhancer construct and EGFP (E), scr shRNA (F), or respective wt +3 kb enhancer construct (G, H). NS – not  
395 significant, \* p<0.05, \*\* p<0.01, \*\*\* p<0.001 (paired two-tailed t-test).

396 Finally, we elucidated the role of E-box binding proteins in the regulation of +3 kb enhancer region. Using  
397 luciferase reporter assays, we found that silencing TCF4 expression with TCF4 shRNA-expressing plasmid  
398 decreased the activity of the +3 kb enhancer region in both unstimulated and KCl and BDNF-stimulated  
399 neurons. However, the effects were slightly smaller when the enhancer region was in the reverse  
400 orientation (Figure 8F). Based on the TCF4 and NeuroD2 ChIP-seq data (Figure 8C), we identified a putative  
401 E-box binding sequence in the +3 kb enhancer region (CAGATG). To determine the relevance of this E-box  
402 element, we generated +3 kb enhancer-containing reporter constructs where this E-box motif was  
403 mutated (CAGAAC). We determined that this motif participates in regulating both the basal activity and  
404 BDNF and KCl-induced activity of the enhancer region (Figure 8G). Importantly, mutating the E-box  
405 decreased the ability of the +3 kb enhancer region to potentiate transcription from BDNF promoter I in  
406 reporter assays (Figure 8H).

407 Collectively, we have identified numerous transcription factors that potentially regulate the activity of +3  
408 kb enhancer region, and further discovered a functional E-box element in the enhancer, possibly  
409 conferring neuron-specific activity of the +3 kb enhancer region.

## 410 DISCUSSION

411 BDNF promoters I, II, and III are located within a relatively compact (~2 kb) region in the genome, making  
412 it possible that their activity is controlled by a common mechanism. A similar spatial clustering of BDNF  
413 exons seems to be conserved in vertebrates, with a similar genomic organization observed in frog (Kidane  
414 et al., 2009), chicken (Yu et al., 2009), zebrafish (Heinrich and Pagtakhan, 2004), rodents and human (Aid  
415 et al., 2007; Pruunsild et al., 2007). It has previously been suggested that BDNF promoters I and II could  
416 be co-regulated as one functional unit (Hara et al., 2009; Timmusk et al., 1999; West et al., 2014). Here,  
417 we show that the promoters of BDNF exons I, II, and III are co-regulated as a neuron-specific unit through  
418 a conserved enhancer region located downstream of exon III.

419 We have previously reported that exon I-containing BDNF transcripts contain in-frame alternative  
420 translation start codon that is used more efficiently for translation initiation than the canonical start codon  
421 in the exon IX (Koppel et al., 2015). As the BDNF exon I-containing transcripts are highly inducible in  
422 response to different stimuli, they could make a substantial contribution to the overall production of BDNF  
423 protein in neurons, despite the low basal expression levels of this transcript. Remarkably, the BDNF  
424 transcripts from the first cluster of exons have been shown to regulate important aspects of behavior. In

425 female mice, BDNF exon I-containing transcripts are important for proper sexual and maternal behavior  
426 (Maynard et al., 2018b), whereas in male mice the BDNF exon I and exon II-containing transcripts regulate  
427 serotonin signaling and control aggressive behavior (Maynard et al., 2016b). Furthermore, it has been  
428 shown that BDNF exon I-containing transcripts in the hypothalamus participate in energy metabolism and  
429 thermoregulation (You et al., 2020). The +3 kb enhancer identified in our work might therefore be an  
430 important regulator of BDNF gene expression in the formation of the neural circuits regulating both social  
431 behavior and energy metabolism. Further work will address this possibility experimentally.

432 The data from Nord et al. (2013) indicates that the highest H3K27ac modification, a hallmark of active  
433 regulatory region, at the +3 kb enhancer region in development occurs a week before and a week after  
434 birth in mice – coinciding with the period of late neurogenesis, neuronal migration, synaptogenesis, and  
435 maturation of neurons (Reemst et al., 2016). It appears that the +3 kb enhancer region is mostly active in  
436 early life and participates in the development of the central nervous system via regulating BDNF  
437 expression. However, it is also possible that the decline in H3K27ac mark in murine brain tissue during  
438 postnatal development is due to the increased amount of non-neuronal cells in the brain compared to  
439 neurons. Although the activity of the +3 kb enhancer seems to decrease with age, it is plausible that it  
440 remains active also in later postnatal life and upregulates BDNF expression, thereby regulating synaptic  
441 plasticity in the adult organism.

442 Based on the induction of eRNA expression from the +3 kb enhancer region upon depolarization and  
443 BDNF-TrkB signaling in both luciferase reporter assays and in the endogenous context, and binding of  
444 various activity-dependent transcription factors to the +3 kb region, our data indicates that in addition to  
445 conferring neuron-specificity, the +3 kb enhancer region also participates in BDNF-TrkB signaling and  
446 neuronal activity-induced expression of the first cluster of BDNF transcripts. Furthermore, repressing or  
447 activating the +3 kb enhancer region with CRISPRi or CRISPRa also affected the stimulus-induced levels of  
448 these transcripts. Notably, the part of the BDNF gene containing the +3 kb enhancer has previously been  
449 implicated in the Reelin-mediated induction of BDNF expression (Telese et al., 2015), indicating that the  
450 +3 kb enhancer could respond to other stimuli in addition to membrane depolarization and TrkB signaling.

451 We also investigated the possibility that the +3 kb enhancer contributes to the catecholamine-induced  
452 expression of BDNF transcripts in rat cultured cortical astrocytes (Koppel et al., 2018) and noted that even  
453 though the activation of the +3 kb enhancer increased the basal and stimulus-induced expression of all  
454 BDNF transcripts, repression of the +3 kb enhancer had almost no effect on BDNF expression.  
455 Furthermore, the transcriptional activity of the +3 kb enhancer was not induced by dopamine-treatment  
456 in luciferase reporter assay, further indicating that the +3 kb region is not the enhancer responsible for  
457 catecholamine-dependent induction of BDNF expression. Interestingly, the dopamine-dependent  
458 induction of BDNF exon II-containing transcripts was abolished when the +3 kb enhancer was repressed  
459 using CRISPRi, suggesting that the +3 kb enhancer region might control the activity of stimulus-specific  
460 expression of BDNF promoter II in astrocytes. Since the activity of BDNF promoter II is regulated by  
461 neuron-restrictive silencer factor (NRSF) (Timmusk et al., 1999), it is possible that the drastic decrease in  
462 the dopamine-dependent induction of BDNF exon II-containing transcripts was due to the cooperative  
463 effect between NRSF and the +3 kb enhancer region. Further investigation is needed to determine  
464 whether this hypothesis is true and whether such cooperation between the +3 kb enhancer region and  
465 NRSF binding to BDNF exon II also happens in neurons. Although we have not tested this directly, our data  
466 does not support the notion that the +3 kb region is an active repressor in non-neuronal cells, e.g.  
467 astrocytes. Instead, it seems that the +3 kb enhancer is a positive regulator of BDNF gene operating

468 specifically in neurons. We conclude that the +3 kb enhancer region is largely inactive in rat cultured  
469 cortical astrocytes and it is distinct from the distal *cis*-regulatory region controlling the catecholamine-  
470 induced activities of BDNF promoters IV and VI.

471 Our results indicate that the +3 kb enhancer can receive regulatory inputs from various basic helix-loop-  
472 helix transcription factors, including TCF4 and its pro-neural heterodimerization partners NeuroD2 and  
473 NeuroD6. Single-cell RNA-seq analysis in the mouse cortex and hippocampus has indicated that NeuroD  
474 transcription factors are expressed mainly in excitatory neurons, similar to BDNF (Tasic et al., 2016). It has  
475 been reported that NeuroD2 preferentially binds to E-boxes CAGCTG or CAGATG (Fong et al., 2012), which  
476 is in agreement with the functional E-box CAGATG sequence found in the +3 kb enhancer. Furthermore,  
477 it has been previously shown that NeuroD2 knock-out animals exhibit decreased BDNF levels in the  
478 cerebellum (Olson et al., 2001). However, Olson et al found no change in BDNF levels in the cerebral cortex  
479 of these knock-out animals. It is possible that different NeuroD family transcription factors regulate BDNF  
480 expression in different brain areas and developmental stages, or that a compensatory mechanism  
481 between NeuroD2 and NeuroD6, both binding the +3 kb enhancer region in our *in vitro* DNA pulldown  
482 assay, exists in cortical neurons of NeuroD2 knock-out animals. It has been well-described that NeuroD  
483 transcription factors regulate neuronal differentiation (Massari and Murre, 2000), axonogenesis (Bormuth  
484 et al., 2013), neuronal migration (Guzelsoy et al., 2019), and proper synapse formation (Ince-Dunn et al.,  
485 2006; Wilke et al., 2012). As BDNF also has a role in the aforementioned processes (Park and Poo, 2013),  
486 it is plausible that at least some of the effects carried out by NeuroD family result from increasing BDNF  
487 expression. Further work is needed to clarify the exact role of TCF4 and NeuroD transcription factors in  
488 BDNF expression.

489 In conclusion, we have identified a novel intronic enhancer region governing the expression of neuron-  
490 specific BDNF transcripts starting from the first cluster of exons – exons I, II, and III – in mammals. Exciting  
491 questions for further work are whether the +3 kb enhancer region is active in all neurons or in specific  
492 neuronal subtypes, and whether the activity of this enhancer element underlies *in vivo* contributions of  
493 BDNF to brain development and function.

## 494 **MATERIALS AND METHODS**

### 495 ***1. Cultures of rat primary cortical neurons***

496 All animal procedures were performed in compliance with the local ethics committee. Cultures of cortical  
497 neurons from embryonic day (E) 21 Sprague Dawley rat embryos of both sexes were prepared as described  
498 previously (Esvald et al., 2020). The cells were grown in Neurobasal A (NBA) medium (Gibco) containing  
499 1× B27 supplement (Gibco), 1 mM L-glutamine (Gibco), 100 U/ml penicillin and 0.1 mg/ml streptomycin  
500 (Gibco) or 100 µg/ml Primocin (Invivogen) instead of penicillin/streptomycin at 37 °C in 5% CO<sub>2</sub>  
501 environment. At 2 days *in vitro* (DIV), half of the medium was replaced with fresh supplemented NBA, or  
502 the whole medium was replaced for cells transduced with lentiviruses. To inhibit the proliferation of non-  
503 neuronal cells a mitotic inhibitor 5-fluoro-2'-deoxyuridine (FDU, final concentration 10 µM, Sigma-Aldrich)  
504 was added with the change of the medium.

### 505 ***2. Cultures of rat primary cortical astrocytes***

506 Cultures of cortical astrocytes were prepared from E21 Sprague Dawley rat embryos of both sexes as  
507 described previously (Koppel et al., 2018). The cells were grown in 75 cm<sup>2</sup> tissue culture flasks in

508 Dulbecco's Modified Eagle Medium (DMEM with high glucose, PAN Biotech) supplemented with 10% fetal  
509 bovine serum (PAN Biotech) and 100 U/ml penicillin and 0.1 mg/ml streptomycin (Gibco) at 37 °C in 5%  
510 CO<sub>2</sub> environment. At 1 DIV, the medium was replaced with fresh growth medium to remove loose tissue  
511 clumps. At 6 DIV, the flasks were placed into a temperature-controlled shaker Certomat® BS-1 (Sartorius  
512 Group) for 17-20 hours and shaken at 180 rpm at 37 °C to detach non-astroglial cells from the flask. After  
513 overnight shaking, the medium was removed along with unattached non-astrocytic cells, and astrocytes  
514 were washed three times with 1× PBS. Astrocytes were detached from the flask with trypsin-EDTA solution  
515 (0.25% Trypsin-EDTA (1×), Gibco) diluted 4 times with 1× PBS at 37 °C for 3-5 minutes. Trypsinized  
516 astrocytes were resuspended in supplemented DMEM and centrifuged at 200 × g for 6 minutes. The  
517 supernatant was removed, astrocytes were resuspended in supplemented DMEM and seeded on cell  
518 culture plates previously coated with 0.2 mg/ml poly-L-lysine (Sigma-Aldrich) in Milli-Q. At 9 DIV, the  
519 whole medium was replaced with fresh supplemented DMEM.

### 520 **3. Drug treatments**

521 At 7 DIV, cultured neurons were pre-treated with 1 μM tetrodotoxin (Tocris) until the end of the  
522 experiment to inhibit spontaneous neuronal activity. At 8 DIV, neurons were treated with 50 ng/ml human  
523 recombinant BDNF (Peprotech) or with a mixture of 25 mM KCl and 5 μM NMDA receptor antagonist D-  
524 2-amino-5-phosphopentanoic acid (D-APV, Cayman Chemical Company) to study BDNF autoregulation or  
525 neuronal activity-dependent expression of the BDNF gene, respectively.

526 Cultured cortical astrocytes were treated at 15 DIV with 150 μM dopamine (Tocris) to study the regulation  
527 of the BDNF gene by catecholamines or 0.15% DMSO (Sigma) as a vehicle control in fresh serum-free and  
528 antibiotics-free DMEM (DMEM with high glucose, PAN Biotech).

### 529 **4. Transfection of cultured cells and luciferase reporter assay**

530 Rat +3 kb enhancer (chr3:100771267-100772697, rn6 genome assembly) or +11 kb intron  
531 (chr3:100778398-100779836, rn6 genome assembly) regions were amplified from rat BDNF BAC construct  
532 (Koppel et al., 2018) using Phusion Hot Start II DNA Polymerase (Thermo Fisher Scientific) and cloned into  
533 pGL4.15 vector (Promega) in front of the Firefly luciferase coding sequence. To generate reporter  
534 constructs containing both BDNF promoter and enhancer region, the hygromycin expression cassette  
535 downstream of Firefly luciferase expression cassette in pGL4.15 vector was replaced with a new multiple  
536 cloning site, into which the +3 kb enhancer or +11 kb intron regions were cloned in either forward or  
537 reverse orientation (relative to the rat BDNF gene). The BDNF promoter regions were obtained from  
538 rat BDNF promoter constructs (Esvold et al., 2020) and cloned in front of the Firefly luciferase coding  
539 sequence. Plasmids encoding control and TCF4 shRNA have been published previously (Sepp et al., 2017).  
540 Coding regions of different dominant negative transcription factors were subcloned from AAV plasmids  
541 (Esvold et al., 2020) into pRRL vector backbone under the control of human PGK promoter.

542 For transfection and luciferase reporter assays, rat cortical neurons or astrocytes were grown on 48-well  
543 cell culture plates. Transfections were carried out in duplicate wells.

544 Cultured cortical neurons were transfected as described previously (Jaanson et al., 2019) with minor  
545 modifications. Transfection was carried out in unsupplemented NBA using 500 ng of the luciferase  
546 reporter construct and 20 ng of a normalizer plasmid pGL4.83-mPGK-hRLuc at 5-6 DIV using Lipofectamine



547 2000 (Thermo Scientific) with DNA to Lipofectamine ratio of 1:2. Transfection was terminated by replacing  
548 the medium with conditioned medium, which was collected from the cells before transfection.

549 Cultured cortical astrocytes were transfected as described previously (Koppel et al., 2018) using 190 ng of  
550 luciferase reporter construct and 10 ng of normalizer plasmid pGL4.83-SR $\alpha$ -hRLuc at 13 DIV using  
551 Lipofectamine 2000 (Thermo Scientific) with DNA to Lipofectamine ratio of 1:3.

552 The cells were lysed with Passive Lysis Buffer (Promega) and luciferase signals were measured with Dual-  
553 Glo<sup>®</sup> Luciferase assay kit (Promega) using GENios pro plate reader (Tecan). Background-corrected Firefly  
554 luciferase signals were normalized to background-corrected Renilla luciferase signals and the averages of  
555 duplicate wells were calculated. Data were log-transformed for statistical analysis, mean and standard  
556 error of the mean (SEM) were calculated, and data were back-transformed for graphical representation.

### 557 **5. CRISPR interference and activator systems, RT-qPCR**

558 pLV-hUbc-dCas9-KRAB-T2A-GFP plasmid used for CRISPR interference has been described previously  
559 (Esvald et al., 2020) and pLV-hUbc-VP64-dCas9-VP64-T2A-GFP plasmid used for CRISPR activation was  
560 obtained from Addgene (plasmid #59791). Lentiviral particles were produced as described previously  
561 (Koppel et al., 2018). Relative viral titers were estimated from provirus incorporation rate measured by  
562 qPCR and an equal amounts of functional viral particles were used for transduction in the following  
563 experiments.

564 Rat cortical neurons were transduced at 0 DIV, whereas cortical astrocytes were transduced after sub-  
565 culturing at 7 DIV. After treatments at 8 DIV for neurons or at 14 DIV for astrocytes, the cells were lysed  
566 and RNA was extracted with RNeasy Mini Kit (Qiagen) using on-column DNA removal with RNase-Free  
567 DNase Set (Qiagen). RNA concentration was measured with BioSpec-nano spectrophotometer (Shimadzu  
568 Biotech). cDNA was synthesized from equal amounts of RNA with Superscript<sup>®</sup> III or Superscript<sup>®</sup> IV  
569 reverse transcriptase (Invitrogen) using oligo(dT)<sub>20</sub> or a mixture of oligo(dT)<sub>20</sub> and random hexamer primer  
570 (ratio 1:1, Microsynth). To measure +3 kb enhancer eRNAs, cDNA was synthesized using a mixture of  
571 antisense-eRNA specific primer and HPRT1 primer (1:1 ratio). The primers used for cDNA synthesis are  
572 listed in Supplementary Table 1.

573 All qPCR reactions were performed in 10  $\mu$ l volume in triplicates with 1 $\times$  HOT FIREpol EvaGreen qPCR Mix  
574 Plus (Solis Biodyne) and primers listed in Supplementary Table 1 on LightCycler<sup>®</sup> 480 PCR instrument II  
575 (Roche). Gene expression levels were normalized to HPRT1 mRNA levels in neurons and Cyclophilin B  
576 mRNA levels in astrocytes. Data were log-transformed and autoscaled (as described in Vandesompele et  
577 al., 2002) for statistical analysis, mean and SEM were calculated, and data were back-transformed for  
578 graphical representation.

### 579 **6. Mouse embryonic stem cells**

580 A2Lox mouse embryonic stem cells (mESCs) containing doxycyclin-inducible Neurogenin2 transgene  
581 (Zhuravskaya and Makeyev, in preparation) were grown in 2i media as described in (Iacovino et al., 2011;  
582 Kainov and Makeyev, 2020). To delete the +3 kb enhancer region, 3 + 3 gRNAs targeting either side of the  
583 +3 kb enhancer core region (targeting sequences listed in Supplementary Table 2) were cloned into pX330  
584 vector (Addgene plasmid #42230). mESCs were co-transfected with a mixture of all 6 CRISPR plasmids and  
585 a plasmid containing a blasticidin expression cassette for selection. One day post transfection, 8  $\mu$ g/ml  
586 blasticidin (Sigma) was added to the media for 3 days after which selection was ended, and cells were



587 grown for an additional 11 days. Finally, single colonies were picked and passaged. The deletion of the +3  
588 kb enhancer region was assessed from genomic DNA with PCR using primers flanking the desired deletion  
589 area. To rule out larger genomic deletions, qPCR-based copy number analysis was carried out with primers  
590 targeting the desired deletion area, and either side of the +3 kb region outside of the desired deletion  
591 area. All primers are listed in Supplementary Table 1. Cell clones containing no deletion, heterozygous or  
592 homozygous deletion of the core conserved enhancer region together with intact flanking regions were  
593 used for subsequent analysis.

594 Selected mESCs were differentiated into neurons as follows. Cells were plated on Matrigel (Gibco) coated  
595 12-well plates at a density of ~25 000 cells/well in N2B27 media (1:1 DMEM F12-HAM and Neurobasal  
596 mixture, 1x N2, 1x B27 with retinoic acid, 1x penicillin-streptomycin, 1 µg/ml laminin, 20 µg/ml insulin, 50  
597 µM L-glutamine) supplemented with 0.1M β-mercaptoethanol (Sigma) and 2 µg/ml doxycycline (Sigma).  
598 After 2 days the whole media was changed to N2B27 media containing 200 µM ascorbic acid (Sigma) and  
599 1 µg/ml doxycycline. Next, half of the media was replaced every 2 days with new N2B27 media containing  
600 200 µM ascorbic acid but no doxycycline. On the 12<sup>th</sup> day of differentiation, cells were treated with Milli-  
601 Q, BDNF (Peprotech), or KCl for 3 hours. All treatments were added together with 25 µM D-APV (Alfa  
602 Aesar). After treatment, the cells were lysed and RNA was extracted using EZ-10 DNAaway RNA Mini-Prep  
603 Kit (Bio Basic inc). cDNA was synthesized using Superscript IV (Thermo Fischer) and qPCR was performed  
604 with HOT FIREPol EvaGreen qPCR Mix Plus (Solis Biodyne) or qPCRBIO SyGreen Mix Lo-ROX (PCR  
605 Biosystems Ltd) on LightCycler 96 (Roche). The levels of CNOT4 mRNA expression were used for  
606 normalization. Used primers are listed in Supplementary Table 1.

#### 607 **7. *In vitro* DNA pulldown mass-spectrometry**

608 855 bp region of the +3 kb enhancer and +11 kb intronic region were amplified with PCR using HotFirePol  
609 polymerase (Solis Biodyne) and primers listed in Supplementary Table 1, with the reverse primers having  
610 a 5' biotin modification (Microsynth). PCR products were purified using DNA Clean & Concentrator™-100  
611 kit (Zymo Research) using a 1:5 ratio of PCR solution and DNA binding buffer. The concentration of the  
612 DNA was determined with Nanodrop 2000 spectrophotometer (Thermo Scientific).

613 The preparation of nuclear lysates was performed as follows. Cortices from 8 days old Sprague Dawley rat  
614 pups of both sexes were dissected and snap-frozen in liquid nitrogen. Nuclear lysates were prepared with  
615 high salt extraction as in (Wu, 2006) and (Lahiri and Ge, 2000) with minor modifications. Briefly, cortices  
616 were weighed and transferred to pre-cooled Dounce tissue grinder (Wheaton). 2 ml of ice-cold  
617 cytoplasmic lysis buffer (10 mM Hepes, pH 7.9 (adjusted with NaOH), 10 mM KCl, 1.5 mM MgCl<sub>2</sub>, 0.5%  
618 NP-40, 300 mM sucrose, 1x cComplete™ Protease Inhibitor Cocktail (Roche), and phosphatase inhibitors  
619 as follows: 5 mM NaF (Fisher Chemical), 1 mM beta-glycerophosphate (Acros Organics), 1 mM Na<sub>3</sub>VO<sub>4</sub>  
620 (ChemCruz, sc-3540A) and 1 mM Na<sub>4</sub>P<sub>2</sub>O<sub>7</sub> (Fisher Chemical)) was added and tissue was homogenized 10  
621 times with tight pestle. Next, the lysate was transferred to a 15 ml tube and cytoplasmic lysis buffer was  
622 added to a total volume of 1 ml per 0.1 g of tissue. The lysate was incubated on ice for 10 minutes with  
623 occasional inverting. Next, the lysate was transferred to a 100 µm nylon cell strainer (VWR, ref nr 732-  
624 2759) to remove tissue debris and the flow-through was centrifuged at 2600 × g at 4 °C for 1 min to pellet  
625 nuclei. The supernatant (cytoplasmic fraction) was discarded and the nuclear pellet was resuspended in 1  
626 ml per 1 g of tissue ice-cold nuclear lysis buffer (20 mM Hepes, pH 7.9, 420 mM NaCl, 1.5 mM MgCl<sub>2</sub>, 0.1  
627 mM EDTA, 2.5% Glycerol, 1x cComplete™ Protease Inhibitor Cocktail (Roche), and phosphatase inhibitors)  
628 and transferred to a new Eppendorf tube. To extract nuclear proteins, the pellet was rotated at 4 °C for

629 30 minutes and finally centrifuged at  $11\ 000 \times g$  at  $4\ ^\circ\text{C}$  for 10 min. The supernatant was collected as  
630 nuclear fraction and protein concentration was measured with BCA Protein Assay Kit (Pierce).

631 *In vitro* DNA pulldown was performed as follows. Two biological replicates were performed using nuclear  
632 lysates of cortices from pups of different litters. Pierce™ Streptavidin Magnetic Beads (50  $\mu\text{l}$  per pulldown  
633 reaction) were washed 2 times with  $1\times$  binding buffer (BB, 5 mM Tris-HCl, pH 7.5, 0.5 mM EDTA, 1 M NaCl,  
634 0.05% Tween-20), resuspended in  $2\times$  BB, and an equal volume of 50 pmol biotinylated DNA (in 10 mM  
635 Tris-HCl, pH 8.5, 0.1 mM EDTA) was added and incubated at room temperature for 30 min with rotation.  
636 To remove the unbound probe, the beads were washed 3 times with  $1\times$  BB. Finally, 400  $\mu\text{g}$  of nuclear  
637 proteins (adjusted to a concentration of 1.6 mg/ml with nuclear lysis buffer) and an equal volume of buffer  
638 D (20 mM HEPES, pH 7.9, 100 mM KCl, 0.2 mM EDTA, 8% glycerol,  $1\times$  cComplete™ Protease Inhibitor  
639 Cocktail (Roche), and phosphatase inhibitors) were added and incubated with rotation at  $4\ ^\circ\text{C}$  overnight.  
640 The next day, the beads were washed 3 times with  $1\times$  PBS, once with 100 mM NaCl and once with 200  
641 mM NaCl. Bound DNA and proteins were eluted with 16 mM biotin (Sigma) in water (at pH 7.0) at  $80\ ^\circ\text{C}$   
642 for 5 min, the eluate was transferred to a new tube and snap-frozen in liquid nitrogen.

643 Mass-spectrometric analysis of the eluates was performed with nano-LC-MS/MS using Q Exactive Plus  
644 (Thermo Scientific) at Proteomics core facility at the University of Tartu, Estonia, as described previously  
645 (Mutso et al., 2018) using label-free quantification instead of SILAC and *Rattus norvegicus* reference  
646 proteome for analysis. The full lists of proteins obtained from mass-spectrometric analysis are shown in  
647 Supplementary Table 3. Custom R-script was used to keep only transcription factors based on gene  
648 symbols of mammalian genes from gene ontology categories "RNA polymerase II cis-regulatory region  
649 sequence-specific DNA binding" and "DNA-binding transcription factor activity" obtained from  
650 [www.geneontology.org](http://www.geneontology.org) (16.03.2020). At least 1.45-fold enrichment to the +3 kb enhancer probe  
651 compared to the +11 kb intronic probe was used as a cutoff for specific binding. The obtained lists were  
652 manually curated to generate Venn diagram illustration of the experiment.

### 653 **8. Chromatin immunoprecipitation**

654 Chromatin immunoprecipitation (ChIP) assay was performed as described previously (Esvold et al., 2020)  
655 using 10 min fixation with 1% formaldehyde. 5  $\mu\text{g}$  of CREB antibody (catalog #06-863, lot 2446851, Merck  
656 Millipore) or TCF4 antibody (CeMines) was used per immunoprecipitation (IP). DNA enrichment was  
657 measured using qPCR. All qPCR reactions were performed in 10  $\mu\text{l}$  volume in triplicates with  $1\times$  LightCycler  
658 480 SYBR Green I Master kit (Roche) and primers listed in Supplementary Table 1 on LightCycler® 480 PCR  
659 instrument II (Roche). Primer efficiencies were determined by serial dilutions of input samples and were  
660 used for analysing the results. Percent of input enrichments were calculated for each region and IP, and  
661 data were log-transformed before statistical analysis.

662 ENCODE data of different ChIP-seq experiments was visualized using UCSC Genome Browser track  
663 "Transcription Factor ChIP-seq Peaks (340 factors in 129 cell types) from ENCODE 3 Data version: ENCODE  
664 3 Nov 2018". Data of previously published ChIP-seq experiments were obtained from Gene Expression  
665 Omnibus with accession numbers GSM530173, GSM530174, GSM530182, GSM530183 (Kim et al., 2010),  
666 GSM1467429, GSM1467434 (Malik et al., 2014), GSM1820990 (Moen et al., 2017), GSM1647867 (Sun et  
667 al., 2019), GSM1649148 (Bayam et al., 2015), and visualized using Integrative Genomics Viewer version  
668 2.8.0 (Robinson et al., 2011).

669

## 670 **9. Statistical analysis**

671 All statistical tests and tested hypotheses were decided before performing the experiments. As ANOVA's  
672 requirement of homoscedasticity was not met, two-tailed paired or unpaired equal variance t-test, as  
673 reported at each figure, was used for statistical analysis using Excel 365 (Microsoft). To preserve statistical  
674 power, p-values were not corrected for multiple comparisons as recommended by (Feise, 2002; Rothman,  
675 1990; Streiner and Norman, 2011).

## 676 **ACKNOWLEDGEMENTS**

677 This work was supported by Estonian Research Council (institutional research funding IUT19-18 and grant  
678 PRG805), Norwegian Financial Mechanism (Grant EMP128), European Union through the European  
679 Regional Development Fund (Project No. 2014-2020.4.01.15-0012), H2020-MSCA-RISE-2016 (Grant  
680 EU734791), the Biotechnology and Biological Sciences Research Council (BB/M001199/1, BB/M007103/1,  
681 and BB/R001049/1). This work has also been partially supported by “TUT Institutional Development  
682 Program for 2016-2022” Graduate School in Clinical medicine receiving funding from the European  
683 Regional Development Fund under program ASTRA 2014-2020.4.01.16-0032 in Estonia. We thank Epp Väli  
684 and Andra Moistus for technical assistance, Indrek Koppel and Priit Pruunsild for critical reading of the  
685 manuscript.

686 **Competing interests:** The authors declare no competing financial interests.

## 687 **REFERENCES**

- 688 Aid T, Kazantseva A, Piirsoo M, Palm K, Timmusk T. 2007. Mouse and rat BDNF gene structure and  
689 expression revisited. *J Neurosci Res* **85**:525–535. doi:10.1002/jnr.21139
- 690 Autry AE, Monteggia LM. 2012. Brain-derived neurotrophic factor and neuropsychiatric disorders.  
691 *Pharmacol Rev* **64**:238–258. doi:10.1124/pr.111.005108
- 692 Banerji J, Rusconi S, Schaffner W. 1981. Expression of a  $\beta$ -globin gene is enhanced by remote SV40 DNA  
693 sequences. *Cell* **27**:299–308. doi:10.1016/0092-8674(81)90413-X
- 694 Bayam E, Sahin GS, Guzelsoy G, Guner G, Kabakcioglu A, Ince-Dunn G. 2015. Genome-wide target analysis  
695 of NEUROD2 provides new insights into regulation of cortical projection neuron migration and  
696 differentiation. *BMC Genomics* **16**:681. doi:10.1186/s12864-015-1882-9
- 697 Bormuth I, Yan K, Yonemasu T, Gummert M, Zhang M, Wichert S, Grishina O, Pieper A, Zhang W, Goebbels  
698 S, Tarabykin V, Nave K-A, Schwab MH. 2013. Neuronal Basic Helix–Loop–Helix Proteins Neurod2/6  
699 Regulate Cortical Commissure Formation before Midline Interactions. *J Neurosci* **33**:641–651.  
700 doi:10.1523/JNEUROSCI.0899-12.2013
- 701 Buecker C, Wysocka J. 2012. Enhancers as information integration hubs in development: lessons from  
702 genomics. *Trends Genet TIG* **28**:276–284. doi:10.1016/j.tig.2012.02.008
- 703 Burbach GJ, Hellweg R, Haas CA, Turco DD, Deicke U, Abramowski D, Jucker M, Staufenbiel M, Deller T.  
704 2004. Induction of Brain-Derived Neurotrophic Factor in Plaque-Associated Glial Cells of Aged  
705 APP23 Transgenic Mice. *J Neurosci* **24**:2421–2430. doi:10.1523/JNEUROSCI.5599-03.2004
- 706 Carullo NVN, Day JJ. 2019. Genomic Enhancers in Brain Health and Disease. *Genes* **10**.  
707 doi:10.3390/genes10010043
- 708 Ernfors P, Lee K-F, Jaenisch R. 1994. Mice lacking brain-derived neurotrophic factor develop with sensory  
709 deficits. *Nature* **368**:147–150. doi:10.1038/368147a0
- 710 Esvald E-E, Tuvikene J, Sirp A, Patil S, Bramham CR, Timmusk T. 2020. CREB Family Transcription Factors  
711 Are Major Mediators of BDNF Transcriptional Autoregulation in Cortical Neurons. *J Neurosci*  
712 **40**:1405–1426. doi:10.1523/JNEUROSCI.0367-19.2019

- 713 Feise RJ. 2002. Do multiple outcome measures require p-value adjustment? *BMC Med Res Methodol* **2**:8.
- 714 Fong AP, Yao Z, Zhong JW, Cao Y, Ruzzo WL, Gentleman RC, Tapscott SJ. 2012. Genetic and Epigenetic  
715 Determinants of Neurogenesis and Myogenesis. *Dev Cell* **22**:721–735.  
716 doi:10.1016/j.devcel.2012.01.015
- 717 Ghosh A, Carnahan J, Greenberg ME. 1994. Requirement for BDNF in activity-dependent survival of  
718 cortical neurons. *Science* **263**:1618–1623.
- 719 Guzelsoy G, Akkaya C, Atak D, Dunn CD, Kabakcioglu A, Ozlu N, Ince-Dunn G. 2019. Terminal neuron  
720 localization to the upper cortical plate is controlled by the transcription factor NEUROD2. *Sci Rep*  
721 **9**:19697. doi:10.1038/s41598-019-56171-x
- 722 Hallock HL, Quillian HM, Mai Y, Maynard KR, Hill JL, Martinowich K. 2019. Manipulation of a genetically  
723 and spatially defined sub-population of BDNF-expressing neurons potentiates learned fear and  
724 decreases hippocampal-prefrontal synchrony in mice. *Neuropsychopharmacology* **1**.  
725 doi:10.1038/s41386-019-0429-1
- 726 Hara D, Fukuchi M, Miyashita T, Tabuchi A, Takasaki I, Naruse Y, Mori N, Kondo T, Tsuda M. 2009. Remote  
727 control of activity-dependent BDNF gene promoter-I transcription mediated by REST/NRSF.  
728 *Biochem Biophys Res Commun* **384**:506–511. doi:10.1016/j.bbrc.2009.05.007
- 729 Heinrich G, Pagtakhan CJ. 2004. Both 5' and 3' flanks regulate Zebrafish brain-derived neurotrophic factor  
730 gene expression. *BMC Neurosci* **5**:19. doi:10.1186/1471-2202-5-19
- 731 Heinz S, Romanoski CE, Benner C, Glass CK. 2015. The selection and function of cell type-specific  
732 enhancers. *Nat Rev Mol Cell Biol* **16**:144–154. doi:10.1038/nrm3949
- 733 Hill JL, Hardy NF, Jimenez DV, Maynard KR, Kardian AS, Pollock CJ, Schloesser RJ, Martinowich K. 2016.  
734 Loss of promoter IV-driven BDNF expression impacts oscillatory activity during sleep, sensory  
735 information processing and fear regulation. *Transl Psychiatry* **6**:e873. doi:10.1038/tp.2016.153
- 736 Ho S-M, Hartley BJ, Tcw J, Beaumont M, Stafford K, Slesinger PA, Brennand KJ. 2016. Rapid Ngn2-induction  
737 of excitatory neurons from hiPSC-derived neural progenitor cells. *Methods, Human Pluripotent*  
738 *Stem Cells* **101**:113–124. doi:10.1016/j.ymeth.2015.11.019
- 739 Hong EJ, McCord AE, Greenberg ME. 2008. A biological function for the neuronal activity-dependent  
740 component of Bdnf transcription in the development of cortical inhibition. *Neuron* **60**:610–624.  
741 doi:10.1016/j.neuron.2008.09.024
- 742 Iacovino M, Bosnakovski D, Fey H, Rux D, Bajwa G, Mahen E, Mitanoska A, Xu Z, Kyba M. 2011. Inducible  
743 cassette exchange: a rapid and efficient system enabling conditional gene expression in  
744 embryonic stem and primary cells. *Stem Cells Dayt Ohio* **29**:1580–1588.
- 745 Ienasescu H, Li K, Andersson R, Vitezic M, Rennie S, Chen Y, Vitting-Seerup K, Lagoni E, Boyd M, Bornholdt  
746 J, de Hoon MJL, Kawaji H, Lassmann T, Hayashizaki Y, Forrest ARR, Carninci P, Sandelin A. 2016.  
747 On-the-fly selection of cell-specific enhancers, genes, miRNAs and proteins across the human  
748 body using SlideBase. *Database* **2016**. doi:10.1093/database/baw144
- 749 Ince-Dunn G, Hall BJ, Hu S-C, Ripley B, Haganir RL, Olson JM, Tapscott SJ, Ghosh A. 2006. Regulation of  
750 Thalamocortical Patterning and Synaptic Maturation by NeuroD2. *Neuron* **49**:683–695.  
751 doi:10.1016/j.neuron.2006.01.031
- 752 Jaanson K, Pärn A, Timmusk T. 2019. Usage of Bacterial Artificial Chromosomes for Studying BDNF Gene  
753 Regulation in Primary Cultures of Cortical Neurons and Astrocytes In: Duarte CB, Tongiorgi E,  
754 editors. Brain-Derived Neurotrophic Factor (BDNF), *Neuromethods*. New York, NY: Springer. pp.  
755 13–25. doi:10.1007/7657\_2018\_10
- 756 Jiang C, Salton S. 2013. The role of neurotrophins in major depressive disorder. *Transl Neurosci* **4**:46–58.  
757 doi:10.2478/s13380-013-0103-8
- 758 Jones KR, Fariñas I, Backus C, Reichardt LF. 1994. Targeted disruption of the BDNF gene perturbs brain and  
759 sensory neuron development but not motor neuron development. *Cell* **76**:989–999.  
760 doi:10.1016/0092-8674(94)90377-8

- 761 Kainov YA, Makeyev EV. 2020. A transcriptome-wide antitermination mechanism sustaining identity of  
762 embryonic stem cells. *Nat Commun* **11**:1–18. doi:10.1038/s41467-019-14204-z
- 763 Kidane AH, Heinrich G, Dirks RPH, de Ruyck BA, Lubsen NH, Roubos EW, Jenks BG. 2009. Differential  
764 Neuroendocrine Expression of Multiple Brain-Derived Neurotrophic Factor Transcripts.  
765 *Endocrinology* **150**:1361–1368. doi:10.1210/en.2008-0993
- 766 Kim T-K, Hemberg M, Gray JM, Costa AM, Bear DM, Wu J, Harmin DA, Laptewicz M, Barbara-Haley K,  
767 Kuersten S, Markenscoff-Papadimitriou E, Kuhl D, Bito H, Worley PF, Kreiman G, Greenberg ME.  
768 2010. Widespread transcription at neuronal activity-regulated enhancers. *Nature* **465**:182–187.  
769 doi:10.1038/nature09033
- 770 Koppel I, Jaanson K, Klasche A, Tuvikene J, Tiirik T, Pärn A, Timmusk T. 2018. Dopamine cross-reacts with  
771 adrenoreceptors in cortical astrocytes to induce BDNF expression, CREB signaling and  
772 morphological transformation. *Glia* **66**:206–216. doi:10.1002/glia.23238
- 773 Koppel I, Tuvikene J, Lekk I, Timmusk T. 2015. Efficient use of a translation start codon in BDNF exon I. *J*  
774 *Neurochem* **134**:1015–1025. doi:10.1111/jnc.13124
- 775 Korte M, Carroll P, Wolf E, Brem G, Thoenen H, Bonhoeffer T. 1995. Hippocampal long-term potentiation  
776 is impaired in mice lacking brain-derived neurotrophic factor. *Proc Natl Acad Sci* **92**:8856–8860.  
777 doi:10.1073/pnas.92.19.8856
- 778 Lahiri DK, Ge Y-W. 2000. Electrophoretic mobility shift assay for the detection of specific DNA–protein  
779 complex in nuclear extracts from the cultured cells and frozen autopsy human brain tissue. *Brain*  
780 *Res Protoc* **5**:257–265. doi:10.1016/S1385-299X(00)00021-0
- 781 Lettice LA, Heaney SJH, Purdie LA, Li L, de Beer P, Oostra BA, Goode D, Elgar G, Hill RE, de Graaff E. 2003.  
782 A long-range Shh enhancer regulates expression in the developing limb and fin and is associated  
783 with preaxial polydactyly. *Hum Mol Genet* **12**:1725–1735.
- 784 Malik AN, Vierbuchen T, Hemberg M, Rubin AA, Ling E, Couch CH, Stroud H, Spiegel I, Farh KK-H, Harmin  
785 DA, Greenberg ME. 2014. Genome-wide identification and characterization of functional neuronal  
786 activity-dependent enhancers. *Nat Neurosci* **17**:1330–1339. doi:10.1038/nn.3808
- 787 Massari ME, Murre C. 2000. Helix-Loop-Helix Proteins: Regulators of Transcription in Eucaryotic  
788 Organisms. *Mol Cell Biol* **20**:429–440. doi:10.1128/MCB.20.2.429-440.2000
- 789 Maynard KR, Hill JL, Calcaterra NE, Palko ME, Kardian A, Paredes D, Sukumar M, Adler BD, Jimenez DV,  
790 Schloesser RJ, Tessarollo L, Lu B, Martinowich K. 2016a. Functional Role of BDNF Production from  
791 Unique Promoters in Aggression and Serotonin Signaling. *Neuropsychopharmacology* **41**:1943–  
792 1955. doi:10.1038/npp.2015.349
- 793 Maynard KR, Hill JL, Calcaterra NE, Palko ME, Kardian A, Paredes D, Sukumar M, Adler BD, Jimenez DV,  
794 Schloesser RJ, Tessarollo L, Lu B, Martinowich K. 2016b. Functional Role of BDNF Production from  
795 Unique Promoters in Aggression and Serotonin Signaling. *Neuropsychopharmacology* **41**:1943–  
796 1955. doi:10.1038/npp.2015.349
- 797 Maynard KR, Hobbs JW, Phan BN, Gupta A, Rajpurohit S, Williams C, Rajpurohit A, Shin JH, Jaffe AE,  
798 Martinowich K. 2018a. BDNF-TrkB signaling in oxytocin neurons contributes to maternal behavior.  
799 *eLife* **7**:e33676. doi:10.7554/eLife.33676
- 800 Maynard KR, Hobbs JW, Phan BN, Gupta A, Rajpurohit S, Williams C, Rajpurohit A, Shin JH, Jaffe AE,  
801 Martinowich K. 2018b. BDNF-TrkB signaling in oxytocin neurons contributes to maternal behavior.  
802 *eLife* **7**:e33676. doi:10.7554/eLife.33676
- 803 McAllan L, Maynard KR, Kardian AS, Stayton AS, Fox SL, Stephenson EJ, Kinney CE, Alshibli NK, Gomes CK,  
804 Pierre JF, Puchowicz MA, Bridges D, Martinowich K, Han JC. 2018. Disruption of brain-derived  
805 neurotrophic factor production from individual promoters generates distinct body composition  
806 phenotypes in mice. *Am J Physiol-Endocrinol Metab*. doi:10.1152/ajpendo.00205.2018



- 807 Moen MJ, Adams HHH, Brandsma JH, Dekkers DHW, Akinci U, Karkampouna S, Quevedo M, Kockx CEM,  
808 Özgür Z, van IJcken WFJ, Demmers J, Poot RA. 2017. An interaction network of mental disorder  
809 proteins in neural stem cells. *Transl Psychiatry* **7**:e1082–e1082. doi:10.1038/tp.2017.52
- 810 Murray KD, Gall CM, Jones EG, Isackson PJ. 1994. Differential regulation of brain-derived neurotrophic  
811 factor and type II calcium/calmodulin-dependent protein kinase messenger RNA expression in  
812 Alzheimer’s disease. *Neuroscience* **60**:37–48. doi:10.1016/0306-4522(94)90202-X
- 813 Mutso M, Morro AM, Smedberg C, Kasvandik S, Aquilimeba M, Teppor M, Tarve L, Lulla A, Lulla V, Saul S,  
814 Thaa B, McInerney GM, Merits A, Varjak M. 2018. Mutation of CD2AP and SH3KBP1 Binding Motif  
815 in Alphavirus nsP3 Hypervariable Domain Results in Attenuated Virus. *Viruses* **10**:226.  
816 doi:10.3390/v10050226
- 817 Nord AS, Blow MJ, Attanasio C, Akiyama JA, Holt A, Hosseini R, Phouanavong S, Plajzer-Frick I, Shoukry  
818 M, Afzal V, Rubenstein JLR, Rubin EM, Pennacchio LA, Visel A. 2013. Rapid and Pervasive Changes  
819 in Genome-wide Enhancer Usage during Mammalian Development. *Cell* **155**:1521–1531.  
820 doi:10.1016/j.cell.2013.11.033
- 821 Nord AS, West AE. 2020. Neurobiological functions of transcriptional enhancers. *Nat Neurosci* **23**:5–14.  
822 doi:10.1038/s41593-019-0538-5
- 823 Nott A, Holtman IR, Coufal NG, Schlachetzki JCM, Yu M, Hu R, Han CZ, Pena M, Xiao J, Wu Y, Keulen Z,  
824 Pasillas MP, O’Connor C, Nickl CK, Schafer ST, Shen Z, Rissman RA, Brewer JB, Gosselin D, Gonda  
825 DD, Levy ML, Rosenfeld MG, McVicker G, Gage FH, Ren B, Glass CK. 2019. Brain cell type–specific  
826 enhancer–promoter interactome maps and disease-risk association. *Science* **366**:1134–1139.  
827 doi:10.1126/science.aay0793
- 828 Olson JM, Asakura A, Snider L, Hawkes R, Strand A, Stoeck J, Hallahan A, Pritchard J, Tapscott SJ. 2001.  
829 NeuroD2 Is Necessary for Development and Survival of Central Nervous System Neurons. *Dev Biol*  
830 **234**:174–187. doi:10.1006/dbio.2001.0245
- 831 Ong C-T, Corces VG. 2011. Enhancer function: new insights into the regulation of tissue-specific gene  
832 expression. *Nat Rev Genet* **12**:283–293. doi:10.1038/nrg2957
- 833 Park H, Poo M. 2013. Neurotrophin regulation of neural circuit development and function. *Nat Rev*  
834 *Neurosci* **14**:7–23. doi:10.1038/nrn3379
- 835 Pruunsild P, Kazantseva A, Aid T, Palm K, Timmusk T. 2007. Dissecting the human BDNF locus: bidirectional  
836 transcription, complex splicing, and multiple promoters. *Genomics* **90**:397–406.  
837 doi:10.1016/j.ygeno.2007.05.004
- 838 Pruunsild P, Sepp M, Orav E, Koppel I, Timmusk T. 2011. Identification of cis-elements and transcription  
839 factors regulating neuronal activity-dependent transcription of human BDNF gene. *J Neurosci Off*  
840 *J Soc Neurosci* **31**:3295–3308. doi:10.1523/JNEUROSCI.4540-10.2011
- 841 Qi LS, Larson MH, Gilbert LA, Doudna JA, Weissman JS, Arkin AP, Lim WA. 2013. Repurposing CRISPR as an  
842 RNA-Guided Platform for Sequence-Specific Control of Gene Expression. *Cell* **152**:1173–1183.  
843 doi:10.1016/j.cell.2013.02.022
- 844 Ravanpay AC, Olson JM. 2008. E protein dosage influences brain development more than family member  
845 identity. *J Neurosci Res* **86**:1472–1481. doi:https://doi.org/10.1002/jnr.21615
- 846 Ray MT, Weickert CS, Webster MJ. 2014. Decreased BDNF and TrkB mRNA expression in multiple cortical  
847 areas of patients with schizophrenia and mood disorders. *Transl Psychiatry* **4**:e389–e389.  
848 doi:10.1038/tp.2014.26
- 849 Reemst K, Noctor SC, Lucassen PJ, Hol EM. 2016. The Indispensable Roles of Microglia and Astrocytes  
850 during Brain Development. *Front Hum Neurosci* **10**. doi:10.3389/fnhum.2016.00566
- 851 Robinson JT, Thorvaldsdóttir H, Winckler W, Guttman M, Lander ES, Getz G, Mesirov JP. 2011. Integrative  
852 genomics viewer. *Nat Biotechnol* **29**:24–26. doi:10.1038/nbt.1754
- 853 Rothman KJ. 1990. No adjustments are needed for multiple comparisons. *Epidemiol Camb Mass* **1**:43–46.



- 854 Sakata K, Woo NH, Martinowich K, Greene JS, Schloesser RJ, Shen L, Lu B. 2009. Critical role of promoter  
855 IV-driven BDNF transcription in GABAergic transmission and synaptic plasticity in the prefrontal  
856 cortex. *Proc Natl Acad Sci* **106**:5942–5947. doi:10.1073/pnas.0811431106
- 857 Sepp M, Vihma H, Nurm K, Urb M, Page SC, Roots K, Hark A, Maher BJ, Pruunsild P, Timmusk T. 2017. The  
858 Intellectual Disability and Schizophrenia Associated Transcription Factor TCF4 Is Regulated by  
859 Neuronal Activity and Protein Kinase A. *J Neurosci Off J Soc Neurosci* **37**:10516–10527.  
860 doi:10.1523/JNEUROSCI.1151-17.2017
- 861 Streiner DL, Norman GR. 2011. Correction for multiple testing: is there a resolution? *Chest* **140**:16–18.  
862 doi:10.1378/chest.11-0523
- 863 Su Y, Shin J, Zhong C, Wang S, Roychowdhury P, Lim J, Kim D, Ming G, Song H. 2017. Neuronal activity  
864 modifies the chromatin accessibility landscape in the adult brain. *Nat Neurosci* **20**:476–483.  
865 doi:10.1038/nn.4494
- 866 Sun Z, Xu X, He J, Murray A, Sun M, Wei X, Wang X, McCoig E, Xie E, Jiang X, Li L, Zhu J, Chen J, Morozov A,  
867 Pickrell AM, Theus MH, Xie H. 2019. EGR1 recruits TET1 to shape the brain methylome during  
868 development and upon neuronal activity. *Nat Commun* **10**:3892. doi:10.1038/s41467-019-11905-  
869 3
- 870 Tao X, Finkbeiner S, Arnold DB, Shaywitz AJ, Greenberg ME. 1998. Ca<sup>2+</sup> influx regulates BDNF transcription  
871 by a CREB family transcription factor-dependent mechanism. *Neuron* **20**:709–726.
- 872 Tasic B, Menon V, Nguyen TN, Kim TK, Jarsky T, Yao Z, Levi B, Gray LT, Sorensen SA, Dolbeare T, Bertagnoli  
873 D, Goldy J, Shapovalova N, Parry S, Lee C, Smith K, Bernard A, Madisen L, Sunkin SM, Hawrylycz  
874 M, Koch C, Zeng H. 2016. Adult mouse cortical cell taxonomy revealed by single cell  
875 transcriptomics. *Nat Neurosci* **19**:335–346. doi:10.1038/nn.4216
- 876 Telese F, Ma Q, Perez PM, Notani D, Oh S, Li W, Comoletti D, Ohgi KA, Taylor H, Rosenfeld MG. 2015. LRP8-  
877 Reelin-Regulated Neuronal Enhancer Signature Underlying Learning and Memory Formation.  
878 *Neuron* **86**:696–710. doi:10.1016/j.neuron.2015.03.033
- 879 Thoma EC, Wischmeyer E, Offen N, Maurus K, Sirén A-L, Scharl M, Wagner TU. 2012. Ectopic expression  
880 of neurogenin 2 alone is sufficient to induce differentiation of embryonic stem cells into mature  
881 neurons. *PLoS One* **7**:e38651. doi:10.1371/journal.pone.0038651
- 882 Timmusk T, Palm K, Lendahl U, Metsis M. 1999. Brain-derived neurotrophic factor expression in vivo is  
883 under the control of neuron-restrictive silencer element. *J Biol Chem* **274**:1078–1084.
- 884 Timmusk T, Palm K, Metsis M, Reintam T, Paalme V, Saarma M, Persson H. 1993. Multiple promoters direct  
885 tissue-specific expression of the rat BDNF gene. *Neuron* **10**:475–489.
- 886 Tuvikene J, Pruunsild P, Orav E, Esvald E-E, Timmusk T. 2016. AP-1 Transcription Factors Mediate BDNF-  
887 Positive Feedback Loop in Cortical Neurons. *J Neurosci Off J Soc Neurosci* **36**:1290–1305.  
888 doi:10.1523/JNEUROSCI.3360-15.2016
- 889 Vandesompele J, De Preter K, Pattyn F, Poppe B, Van Roy N, De Paepe A, Speleman F. 2002. Accurate  
890 normalization of real-time quantitative RT-PCR data by geometric averaging of multiple internal  
891 control genes. *Genome Biol* **3**.
- 892 West AE, Pruunsild P, Timmusk T. 2014. Neurotrophins: Transcription and Translation In: Lewin GR, Carter  
893 BD, editors. *Neurotrophic Factors, Handbook of Experimental Pharmacology*. Berlin, Heidelberg:  
894 Springer. pp. 67–100. doi:10.1007/978-3-642-45106-5\_4
- 895 Wilke SA, Hall BJ, Antonios JK, DeNardo LA, Otto S, Yuan B, Chen F, Robbins EM, Tiglio K, Williams ME, Qiu  
896 Z, Biederer T, Ghosh A. 2012. NeuroD2 regulates the development of hippocampal mossy fiber  
897 synapses. *Neural Develop* **7**:9. doi:10.1186/1749-8104-7-9
- 898 Wong J, Hyde TM, Cassano HL, Deep-Soboslay A, Kleinman JE, Weickert CS. 2010. Promoter specific  
899 alterations of brain-derived neurotrophic factor mRNA in schizophrenia. *Neuroscience* **169**:1071–  
900 1084. doi:10.1016/j.neuroscience.2010.05.037

- 901 Wu H, Nord AS, Akiyama JA, Shoukry M, Afzal V, Rubin EM, Pennacchio LA, Visel A. 2014. Tissue-specific  
902 RNA expression marks distant-acting developmental enhancers. *PLoS Genet* **10**:e1004610.  
903 doi:10.1371/journal.pgen.1004610
- 904 Wu KK. 2006. Analysis of Protein-DNA Binding by Streptavidin-Agarose Pulldown In: Bina M, editor. *Gene  
905 Mapping, Discovery, and Expression: Methods and Protocols, Methods in Molecular Biology*.  
906 Totowa, NJ: Humana Press. pp. 281–290. doi:10.1385/1-59745-097-9:281
- 907 Yasuda M, Fukuchi M, Tabuchi A, Kawahara M, Tsuneki H, Azuma Y, Chiba Y, Tsuda M. 2007. Robust  
908 stimulation of TrkB induces delayed increases in BDNF and Arc mRNA expressions in cultured rat  
909 cortical neurons via distinct mechanisms. *J Neurochem* **103**:626–636. doi:10.1111/j.1471-  
910 4159.2007.04851.x
- 911 You H, Chu P, Guo W, Lu B. 2020. A subpopulation of Bdnf-e1-expressing glutamatergic neurons in the  
912 lateral hypothalamus critical for thermogenesis control. *Mol Metab* **31**:109–123.  
913 doi:10.1016/j.molmet.2019.11.013
- 914 Yu Y, Zhang H, Byerly MS, Bacon LD, Porter TE, Liu GE, Song J. 2009. Alternative splicing variants and DNA  
915 methylation status of BDNF in inbred chicken lines. *Brain Res* **1269**:1–10.  
916 doi:10.1016/j.brainres.2009.01.071
- 917 Zhang Y, Pak C, Han Y, Ahlenius H, Zhang Z, Chanda S, Marro S, Patzke C, Acuna C, Covy J, Xu W, Yang N,  
918 Danko T, Chen L, Wernig M, Südhof TC. 2013. Rapid single-step induction of functional neurons  
919 from human pluripotent stem cells. *Neuron* **78**:785–798. doi:10.1016/j.neuron.2013.05.029
- 920 Zuccato C, Cattaneo E. 2009. Brain-derived neurotrophic factor in neurodegenerative diseases. *Nat Rev*  
921 *Neurol* **5**:311–322. doi:10.1038/nrneurol.2009.54
- 922 Zuccato C, Ciammola A, Rigamonti D, Leavitt BR, Goffredo D, Conti L, MacDonald ME, Friedlander RM,  
923 Silani V, Hayden MR, Timmusk T, Sipione S, Cattaneo E. 2001. Loss of huntingtin-mediated BDNF  
924 gene transcription in Huntington’s disease. *Science* **293**:493–498. doi:10.1126/science.1059581  
925
- 926

927 **SUPPLEMENTARY FIGURES**

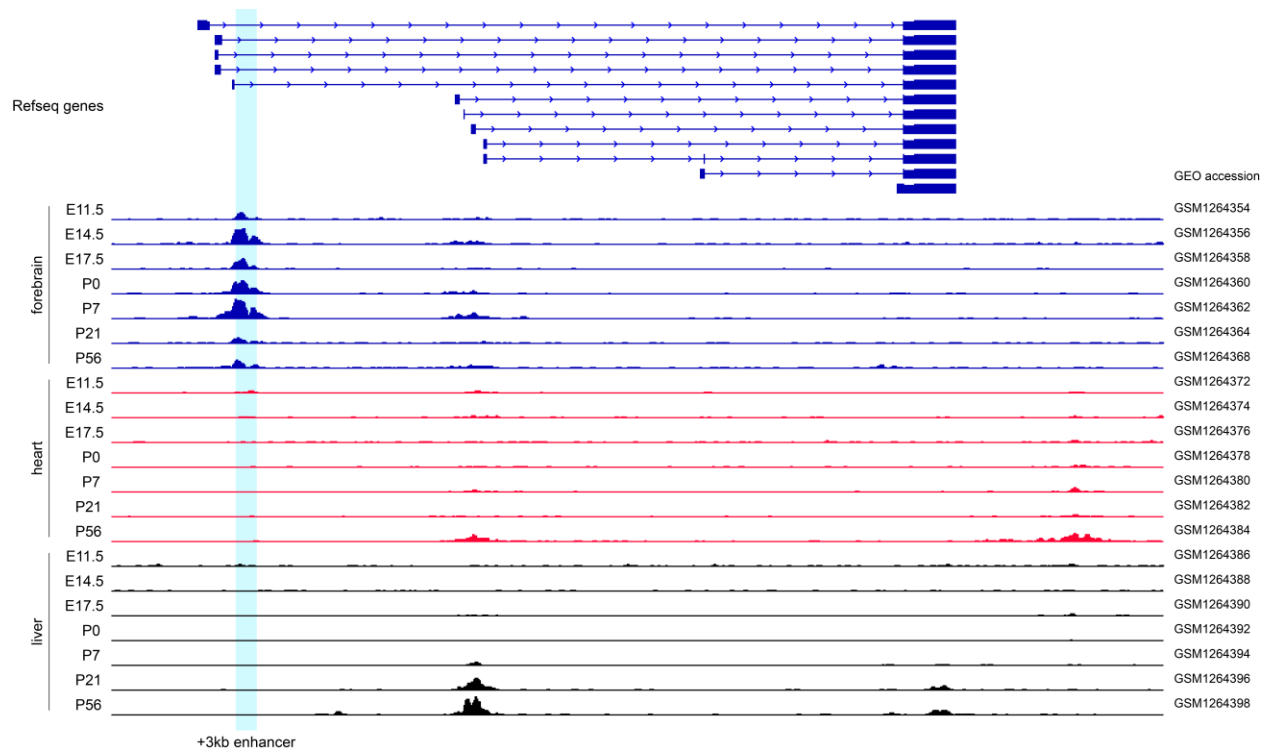

928

929 *Supplementary figure 1. +3 kb enhancer region shows brain-specific H3K27ac histone modification. Integrative Genomics Viewer*  
930 *was used to visualize H3K27ac ChIP-seq data of different mouse tissues throughout the development (Nord et al., 2013). Different*  
931 *BDNF transcripts are shown in the upper part of the figure, developmental stage and tissue are shown on the left. E indicates*  
932 *embryonic day, P postnatal day. +3 kb enhancer region is marked with light blue. GEO accession numbers of the data are shown*  
933 *on the right.*

934

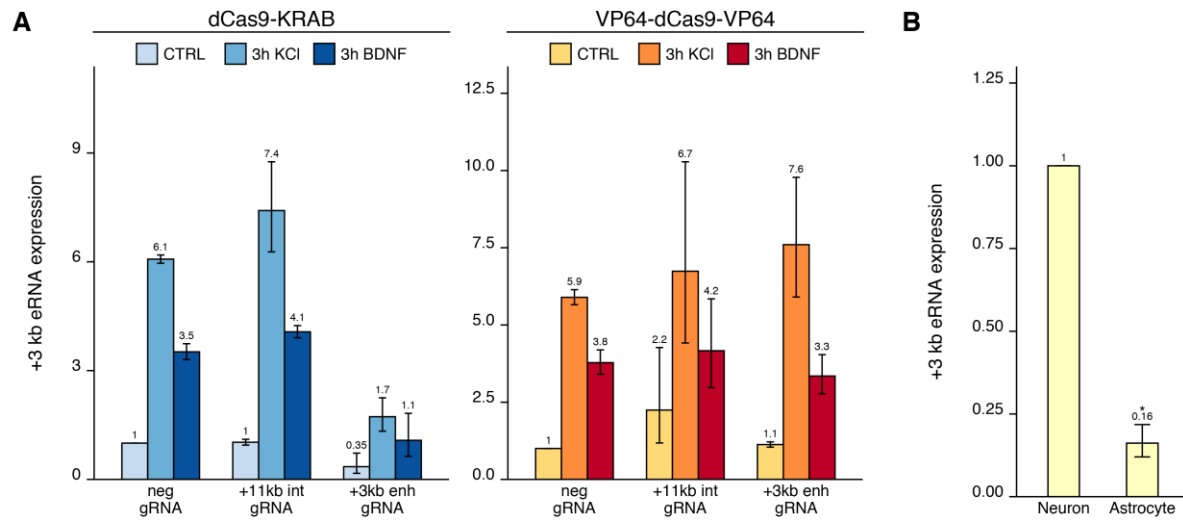

935

936 *Supplementary figure 2. +3 kb enhancer shows stimulus-dependent eRNA transcription in neurons.* (A) Measurement of +3 kb  
 937 eRNA in CRISPRi and CRISPRa experiments in cultured neurons. Rat cultured cortical neurons were transduced at 0 DIV with  
 938 lentiviral particles encoding either dCas9 fused with Krüppel associated box domain (dCas9-KRAB, blue) or 8 copies of VP16 domain  
 939 (VP64-dCas9-VP64, orange) together with lentiviruses encoding either guide RNA that has no corresponding target sequence in  
 940 the rat genome (neg gRNA), a mixture of four gRNAs directed to the putative +3 kb BDNF enhancer (+3 kb enh gRNA) or a mixture  
 941 of four guide RNAs directed to +11 kb intronic region (+11 kb int gRNA). Transduced neurons were left untreated (CTRL) or treated  
 942 with 50 ng/ml BDNF or 25 mM KCl (with 5  $\mu$ M D-APV) for 3 hours at 8 DIV. Expression levels of +3 kb eRNA were measured with  
 943 RT-qPCR and normalized to HPRT1 expression levels. eRNA expression levels are depicted relative to the eRNA expression in  
 944 untreated (CTRL) neurons transduced with negative guide RNA within each set (dCas9-KRAB or VP64-dCas9-VP64). The average  
 945 eRNA expression of independent experiments is depicted above the columns. Error bars represent SEM ( $n = 2$  independent  
 946 experiments). No statistical analysis was performed. (B) Comparison of +3 kb enhancer eRNA expression levels in cultured neurons  
 947 and astrocytes. eRNA expression was measured using RT-qPCR, unnormalized average Ct values were used for the analysis and  
 948 transformed to linear scale for graphical representation. The +3 kb eRNA expression level in neurons was set as 1. The average  
 949 eRNA expression of independent experiments is depicted above the columns. Error bars represent SEM ( $n = 3$  independent  
 950 experiments). \*  $p < 0.05$  (paired two-tailed t-test).

951

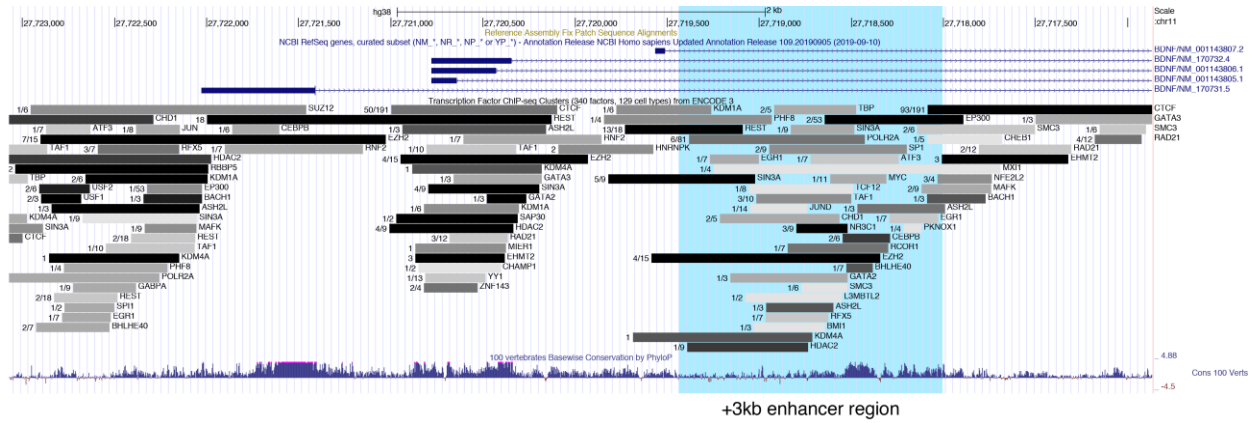

952

953 *Supplementary figure 3. +3 kb enhancer region binds various transcription factors in human cell lines. UCSC Genome Browser*  
 954 *was used to visualize ENCODE ChIP-seq data track "Transcription Factor ChIP-seq Peaks (340 factors in 129 cell types) from*  
 955 *ENCODE 3 Data version: ENCODE 3 Nov 2018" at the +3 kb enhancer region. Numbers indicate cell lines with binding of the*  
 956 *indicated transcription factor/number cell lines assayed for the binding of indicated transcription factor. The +3 kb enhancer region*  
 957 *is shown in light blue.*
